# Supplementary material for: Unravelling a trichloroacetic acid-catalyzed cascade access to benzo[f]chromeno[2,3-h]quinoxalinoporphyrins
Source: publisher site journal article supplement (doi:10.3762/bjoc.19.89), 2023-08-11

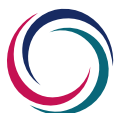

## Supporting Information

for

### Unravelling a trichloroacetic acid-catalyzed cascade access to benzo[*f*]chromeno[2,3-*h*]quinoxalinoporphyrins

Chandra Sekhar Tekuri, Pargat Singh and Mahendra Nath

*Beilstein J. Org. Chem.* **2023**, *19*, 1216–1224. [doi:10.3762/bjoc.19.89](https://doi.org/10.3762/bjoc.19.89)

### Characterization data, $^1\text{H}$ and $^{13}\text{C}$ NMR spectra of newly prepared porphyrin products

| <b>CONTENTS</b>                                                                                   | <b>PAGE</b> |
|---------------------------------------------------------------------------------------------------|-------------|
| <i>Characterization data of copper(II) benzo[f]chromeno[2,3-h]quinoxalino-<br/>porphyrins 3–8</i> | <b>S2</b>   |
| <i>Characterization data of free-base benzo[f]chromeno[2,3-h]quinoxalino-<br/>porphyrins 9–13</i> | <b>S3</b>   |
| <i>Characterization data of zinc(II) benzo[f]chromeno[2,3-h]quinoxalino-<br/>porphyrins 14–16</i> | <b>S5</b>   |
| <i>Characterization data of copper(II) benzo[f]quinoxalinoporphyrin 17</i>                        | <b>S7</b>   |
| <i><sup>1</sup>H and <sup>13</sup>C NMR spectra of free-base and zinc(II) porphyrins 9–16</i>     | <b>S8</b>   |

### Characterization data of copper(II) benzo[*f*]chromeno[2,3-*h*]quinoxalino- porphyrins 3–8

**Copper(II) benzo[*f*]chromeno[2,3-*h*]quinoxalino-  
porphyrin 3**, Ar = 4-CH<sub>3</sub>C<sub>6</sub>H<sub>4</sub>, R = C<sub>6</sub>H<sub>5</sub>  
Purple solid; yield: 65%; mp >300°C; IR (CHCl<sub>3</sub>)  $\nu_{\max}$ : 755, 796, 1003, 1039, 1179, 1210, 1344, 1450, 1507, 1597, 1659, 2872, 2957, 3021 cm<sup>-1</sup>; UV  $\lambda_{\max}$  ( $\epsilon \times 10^{-4}$ , M<sup>-1</sup> cm<sup>-1</sup>): 408 (21.6), 445 (25.6), 562 (3.7), 604 (1.6) nm; ESI-HRMS (m/z) calcd for C<sub>73</sub>H<sub>55</sub>N<sub>6</sub>O<sub>2</sub>Cu: 1110.3677 [M + H]<sup>+</sup>; found 1110.3607.

**Copper(II) benzo[*f*]chromeno[2,3-*h*]quinoxalino-  
porphyrin 4**, Ar = 4-CH<sub>3</sub>C<sub>6</sub>H<sub>4</sub>, R = 4-  
OCH<sub>3</sub>C<sub>6</sub>H<sub>4</sub>

Purple solid; yield: 67%; mp >300°C; IR (CHCl<sub>3</sub>)  $\nu_{\max}$ : 758, 797, 1004, 1039, 1112, 1179, 1211, 1244, 1345, 1456, 1509, 1606, 1660, 2857, 2923, 3020 cm<sup>-1</sup>; UV  $\lambda_{\max}$  ( $\epsilon \times 10^{-4}$ , M<sup>-1</sup> cm<sup>-1</sup>): 409 (23.2), 445 (27.6), 562 (4.4), 602 (2.2) nm; ESI-HRMS (m/z) calcd for C<sub>74</sub>H<sub>57</sub>N<sub>6</sub>O<sub>3</sub>Cu: 1140.3783 [M + H]<sup>+</sup>; found 1140.3784.

**Copper(II) benzo[*f*]chromeno[2,3-*h*]quinoxalino-  
porphyrin 5**, Ar = 4-CH<sub>3</sub>C<sub>6</sub>H<sub>4</sub>, R = 4-  
NO<sub>2</sub>C<sub>6</sub>H<sub>4</sub>

Purple solid; yield: 65%; mp >300°C; IR (CHCl<sub>3</sub>)  $\nu_{\max}$ : 763, 798, 1004, 1181, 1213, 1345, 1458, 1518, 1661, 1744, 2323, 2365, 2854, 2923, 3021 cm<sup>-1</sup>; UV  $\lambda_{\max}$  ( $\epsilon \times 10^{-4}$ , M<sup>-1</sup> cm<sup>-1</sup>): 410 (24.6), 447 (23.3), 564 (4.4), 603 (2.4) nm; ESI-HRMS (m/z) calcd for C<sub>73</sub>H<sub>54</sub>N<sub>7</sub>O<sub>4</sub>Cu: 1155.3528 [M + H]<sup>+</sup>; found 1155.3525.

**Copper(II) benzo[*f*]chromeno[2,3-*h*]quinoxalino-  
porphyrin 6**, Ar = 4-CH<sub>3</sub>C<sub>6</sub>H<sub>4</sub>, R = 4-  
BrC<sub>6</sub>H<sub>4</sub>

Purple solid; yield: 61%; mp >300°C; IR (CHCl<sub>3</sub>)  $\nu_{\max}$ : 753, 796, 1004, 1178, 1211, 1259, 1344, 1455, 1511, 1656, 2858, 2921, 2958, 3018 cm<sup>-1</sup>; UV  $\lambda_{\max}$  ( $\epsilon \times 10^{-4}$ , M<sup>-1</sup> cm<sup>-1</sup>): 418 (19.3), 444 (13.3), 564 (2.0), 602 (0.6) nm; ESI-HRMS (m/z) calcd for C<sub>73</sub>H<sub>54</sub>BrN<sub>6</sub>O<sub>2</sub>Cu: 1188.2782 [M + H]<sup>+</sup>; found 1188.2777.

**Copper(II) benzo[*f*]chromeno[2,3-*h*]quinoxalino-  
porphyrin 7**, Ar = C<sub>6</sub>H<sub>5</sub>, R = C<sub>6</sub>H<sub>5</sub>

Purple solid; yield: 68%; mp >300°C; IR (CHCl<sub>3</sub>)  $\nu_{\max}$ : 700, 750, 796, 1003, 1071, 1212, 1344, 1448, 1514, 1596, 1656, 2957, 3020 cm<sup>-1</sup>; UV  $\lambda_{\max}$  ( $\epsilon \times 10^{-4}$ , M<sup>-1</sup> cm<sup>-1</sup>): 422 (29.9), 443 (19.9) 561 (3.4), 601 (1.7) nm; ESI-HRMS (m/z) calcd for C<sub>69</sub>H<sub>47</sub>N<sub>6</sub>O<sub>2</sub>Cu: 1054.3051 [M + H]<sup>+</sup>; found 1054.3062.

**Copper(II) benzo[*f*]chromeno[2,3-*h*]quinoxalinoporphyrin 8**, Ar = C<sub>6</sub>H<sub>5</sub>, R = 4-BrC<sub>6</sub>H<sub>4</sub>  
Purple solid; yield: 66%; mp >300°C; IR (CHCl<sub>3</sub>)  $\nu_{\max}$ : 759, 797, 1005, 1179, 1211, 1344, 1453, 1510, 1659, 2852, 2921, 3021 cm<sup>-1</sup>; UV  $\lambda_{\max}$  ( $\epsilon \times 10^{-4}$ , M<sup>-1</sup> cm<sup>-1</sup>): 421 (18.0), 445 (17.6), 562 (2.8), 600 (1.5) nm; ESI-HRMS (m/z) calcd for C<sub>69</sub>H<sub>46</sub>N<sub>6</sub>O<sub>2</sub>BrCu: 1132.2156 [M + H]<sup>+</sup>; found 1132.2150.

### Characterization data of free-base benzo[*f*]chromeno[2,3-*h*]quinoxalinoporphyrins 9–13

**Free-base benzo[*f*]chromeno[2,3-*h*]quinoxalinoporphyrin 9**, Ar = 4-CH<sub>3</sub>C<sub>6</sub>H<sub>4</sub>, R = C<sub>6</sub>H<sub>5</sub>  
Purple solid; yield: 80%; mp >300°C; IR (CHCl<sub>3</sub>)  $\nu_{\max}$ : 669, 751, 795, 970, 1031, 1154, 1209, 1301, 1347, 1460, 1509, 1598, 1656, 2850, 2917, 3018, 3346 cm<sup>-1</sup>; <sup>1</sup>H NMR (400 MHz, CDCl<sub>3</sub>)  $\delta_{\text{H}}$ : -2.56 (s, 2H, internal NH), 1.17 (s, 3H, CH<sub>3</sub>), 1.57 (s, 3H, CH<sub>3</sub>), 2.47 (dd, *J* = 16.02 Hz, 2H, CH<sub>2</sub>), 2.71-2.72 (m, 6H, CH<sub>3</sub>), 2.82 (s, 2H, CH<sub>2</sub>), 2.86 (s, 3H, CH<sub>3</sub>), 2.94 (s, 3H, CH<sub>3</sub>), 5.79 (s, 1H, CH), 6.82 (t, *J* = 7.63 Hz, 1H, ArH), 6.93 (t, *J* = 7.63 Hz, 2H, ArH), 7.16 (d, *J* = 7.63 Hz, 2H, ArH), 7.54-7.84 (m, 11H, *meso*-ArH, ArH), 8.00-8.22 (m, 7H, *meso*-ArH), 8.40 (d, *J* = 7.63 Hz, 1H, ArH), 8.63 (d, *J* = 7.63 Hz, 1H, ArH), 8.75 (s, 2H,  $\beta$ -pyrrolic H), 8.91-8.98 (m, 4H,  $\beta$ -pyrrolic H) ppm; <sup>13</sup>C NMR (100 MHz, CDCl<sub>3</sub>)  $\delta_{\text{C}}$ : 14.13, 21.53, 21.74, 21.90, 27.25, 32.16, 32.37, 41.41, 51.28, 115.48, 117.08, 117.98, 118.17, 121.23, 121.47, 125.73, 125.76, 127.41, 127.49, 127.53, 127.75, 127.88, 128.10, 128.14, 128.36, 128.58, 128.76, 131.56, 133.90, 134.12, 134.18, 134.40, 134.48, 134.57, 137.24, 137.28, 137.45, 137.48, 138.10, 138.20, 138.36, 138.61, 138.75, 138.87, 139.05, 139.48, 139.63, 140.33, 144.79, 145.51, 146.71, 149.98, 151.76, 154.89, 155.11, 164.12, 196.25 ppm; UV  $\lambda_{\max}$  ( $\epsilon \times 10^{-4}$ , M<sup>-1</sup> cm<sup>-1</sup>): 441 (28.9), 529 (2.7), 568 (0.3), 600 (1.3), 642 (0.1) nm;  $\lambda_{\text{Em}}$  (CHCl<sub>3</sub>;  $\lambda_{\text{Ex}}$  420 nm): 668, 730 nm; ESI-HRMS (m/z) calcd for C<sub>73</sub>H<sub>57</sub>N<sub>6</sub>O<sub>2</sub>: 1049.4538 [M + H]<sup>+</sup>; found 1049.4558.

**Free-base benzo[*f*]chromeno[2,3-*h*]quinoxalinoporphyrin 10**, Ar = 4-CH<sub>3</sub>C<sub>6</sub>H<sub>4</sub>, R = 4-OCH<sub>3</sub>C<sub>6</sub>H<sub>4</sub>

Purple solid; yield: 78%; mp >300°C; IR (CHCl<sub>3</sub>)  $\nu_{\max}$ : 755 796, 972, 1039, 1170, 1210, 1302, 1372, 1463, 1509, 1606, 1658, 2592, 2679, 2858, 2922, 3018, 3348 cm<sup>-1</sup>; <sup>1</sup>H NMR (400 MHz, CDCl<sub>3</sub>)  $\delta_{\text{H}}$ : -2.36 (s, 2H, internal NH), 1.33 (s, 3H, CH<sub>3</sub>), 1.41 (s, 3H, CH<sub>3</sub>), 2.63 (dd, *J* = 16.02 Hz, 2H, CH<sub>2</sub>), 2.85-2.86 (m, 6H, CH<sub>3</sub>), 2.97 (s, 2H, CH<sub>2</sub>), 3.05 (s, 3H, CH<sub>3</sub>), 3.08 (s, 3H, CH<sub>3</sub>), 3.64 (s, 3H, OCH<sub>3</sub>), 5.91 (s, 1H, CH), 6.65 (d, *J* = 9.16 Hz, 2H, ArH), 7.28 (s, 1H, ArH), 7.69-7.76 (m, 4H, *meso*-ArH, ArH), 7.83-7.96 (m, 6H, *meso*-ArH), 8.07-8.10 (m, 1H, *meso*-ArH), 8.20-8.39 (m, 8H, *meso*-ArH), 8.55 (d, *J* = 7.63 Hz, 1H, ArH), 8.78 (d, *J* = 8.39 Hz, 1H, ArH), 8.92 (s, 2H,  $\beta$ -pyrrolic H), 9.09-9.15 (m, 4H,  $\beta$ -pyrrolic H) ppm; <sup>13</sup>C NMR (100 MHz, CDCl<sub>3</sub>)

$\delta_C$ : 14.13, 21.51, 21.72, 21.93, 27.25, 31.44, 32.37, 41.38, 51.29, 54.83, 112.77, 115.58, 117.11, 118.16, 118.20, 121.21, 121.24, 121.48, 125.75, 125.77, 127.50, 127.52, 127.74, 127.90, 128.12, 128.16, 128.59, 128.74, 129.39, 131.52, 133.93, 134.13, 134.45, 134.56, 135.24, 137.23, 137.32, 137.44, 137.47, 138.11, 138.22, 138.42, 138.67, 138.75, 138.86, 139.00, 139.50, 139.62, 140.36, 144.80, 145.58, 146.52, 149.97, 151.76, 154.90, 155.13, 157.45, 163.85, 196.31 ppm; UV  $\lambda_{\max}$  ( $\epsilon \times 10^{-4}$ ,  $M^{-1} \text{ cm}^{-1}$ ): 441 (53.0), 529 (4.4), 570 (0.5), 600 (2.0), 640 (0.1) nm;  $\lambda_{\text{Em}}$  ( $\text{CHCl}_3$ ;  $\lambda_{\text{Ex}}$  440 nm): 672, 728 nm; ESI-HRMS (m/z) calcd for  $\text{C}_{74}\text{H}_{59}\text{N}_6\text{O}_3$ : 1079.4643  $[\text{M} + \text{H}]^+$ ; found 1079.4649.

**Free-base benzo[*f*]chromeno[2,3-*h*]quinoxalinoporphyrim 11**, Ar = 4- $\text{CH}_3\text{C}_6\text{H}_4$ , R = 4- $\text{NO}_2\text{C}_6\text{H}_4$

Purple solid; yield: 70%; mp  $>300^\circ\text{C}$ ; IR ( $\text{CHCl}_3$ )  $\nu_{\max}$ : 722, 761, 797, 971, 1040, 1162, 1211, 1304, 1345, 1464, 1518, 1599, 1661, 2854, 2923, 3023, 3348  $\text{cm}^{-1}$ ;  $^1\text{H}$  NMR (400 MHz,  $\text{CDCl}_3$ )  $\delta_{\text{H}}$ : -2.55 (s, 2H, internal NH), 1.14 (s, 3H,  $\text{CH}_3$ ), 1.56 (s, 3H,  $\text{CH}_3$ ), 2.48 (dd,  $J = 16.02$ , 2H,  $\text{CH}_2$ ), 2.71-2.72 (m, 6H,  $\text{CH}_3$ ), 2.85 (s, 2H,  $\text{CH}_2$ ), 2.88 (s, 3H,  $\text{CH}_3$ ), 2.93 (s, 3H,  $\text{CH}_3$ ), 5.87 (s, 1H, CH), 7.29-7.31 (m, 2H, ArH), 7.57-7.92 (m, 14H, *meso*-ArH, ArH), 8.07-8.22 (m, 6H, *meso*-ArH), 8.42 (d,  $J = 7.63$  Hz, 1H, ArH), 8.64 (d,  $J = 7.63$  Hz, 1H, ArH), 8.74 (s, 2H,  $\beta$ -pyrrolic H), 8.89-8.95 (m, 4H,  $\beta$ -pyrrolic H) ppm; UV  $\lambda_{\max}$  ( $\epsilon \times 10^{-4}$ ,  $M^{-1} \text{ cm}^{-1}$ ): 441 (21.8), 530 (3.8), 569 (0.4), 600 (2.6), 638 (0.1) nm;  $\lambda_{\text{Em}}$  ( $\text{CHCl}_3$ ;  $\lambda_{\text{Ex}}$  430 nm): 672, 730 nm; ESI-HRMS (m/z) calcd for  $\text{C}_{73}\text{H}_{56}\text{N}_7\text{O}_4$ : 1094.4388  $[\text{M} + \text{H}]^+$ ; found 1094.4395.

**Free-base benzo[*f*]chromeno[2,3-*h*]quinoxalinoporphyrim 12**, Ar = 4- $\text{CH}_3\text{C}_6\text{H}_4$ , R = 4- $\text{BrC}_6\text{H}_4$

Purple solid; yield: 77%; mp  $>300^\circ\text{C}$ ; IR ( $\text{CHCl}_3$ )  $\nu_{\max}$ : 755, 796, 971, 1041, 1156, 1209, 1302, 1368, 1472, 1510, 1600, 1659, 2860, 2920, 2956, 3020, 3345  $\text{cm}^{-1}$ ;  $^1\text{H}$  NMR (400 MHz,  $\text{CDCl}_3$ )  $\delta_{\text{H}}$ : -2.54 (s, 2H, internal NH), 1.16 (s, 3H,  $\text{CH}_3$ ), 1.27 (s, 3H,  $\text{CH}_3$ ), 2.48 (dd,  $J = 16.02$ , 2H,  $\text{CH}_2$ ), 2.72 (s, 6H,  $\text{CH}_3$ ), 2.83 (s, 2H,  $\text{CH}_2$ ), 2.89 (s, 3H,  $\text{CH}_3$ ), 2.94 (s, 3H,  $\text{CH}_3$ ), 5.76 (s, 1H, CH), 7.02-7.07 (m, 4H, ArH), 7.58-7.88 (m, 10H, *meso*-ArH, ArH), 8.04-8.24 (m, 7H, *meso*-ArH), 8.35-8.41 (m, 2H, ArH), 8.64 (d,  $J = 8.39$  Hz, 1H, ArH), 8.75-8.77 (m, 2H,  $\beta$ -pyrrolic H), 8.90-8.97 (m, 4H,  $\beta$ -pyrrolic H) ppm;  $^{13}\text{C}$  NMR (100 MHz,  $\text{CDCl}_3$ )  $\delta_{\text{C}}$ : 21.53, 21.74, 21.89, 27.21, 29.79, 31.97, 32.38, 41.37, 51.21, 114.95, 117.10, 117.33, 118.05, 119.65, 121.27, 121.56, 125.58, 125.81, 127.51, 127.54, 127.76, 127.94, 128.09, 128.21, 128.60, 128.85, 130.30, 130.46, 131.64, 133.95, 134.18, 134.54, 137.26, 137.29, 137.48, 137.51, 138.13, 138.26, 138.43, 138.46, 138.70, 138.83, 139.03, 139.48, 139.63, 140.34, 143.87, 144.61, 145.27, 146.60, 150.07, 151.68, 154.94, 155.19, 164.16, 196.22 ppm; UV  $\lambda_{\max}$  ( $\epsilon \times 10^{-4}$ ,  $M^{-1}$

cm<sup>-1</sup>): 441 (25.0), 529 (2.2), 568 (0.3), 600 (1.1), 639 (0.1) nm;  $\lambda_{Em}$  (CHCl<sub>3</sub>;  $\lambda_{Ex}$  440 nm): 671, 730 nm; ESI-HRMS (m/z) calcd for C<sub>73</sub>H<sub>56</sub>N<sub>6</sub>O<sub>2</sub>Br: 1127.3643 [M + H]<sup>+</sup>; found 1127.3647.

**Free-base benzo[*f*]chromeno[2,3-*h*]quinoxalinoporphyrim 13**, Ar = C<sub>6</sub>H<sub>5</sub>, R = C<sub>6</sub>H<sub>5</sub>  
Purple solid; yield: 76%; mp >300°C IR (CHCl<sub>3</sub>)  $\nu_{max}$ : 750, 798, 968, 1158, 1207, 1347, 1440, 1596, 1657, 2882, 2960, 3022, 3058, 3344 cm<sup>-1</sup>; <sup>1</sup>H NMR (400 MHz, CDCl<sub>3</sub>)  $\delta_H$ : -2.56 (s, 2H, internal NH), 1.19 (s, 3H, CH<sub>3</sub>), 1.28 (s, 3H, CH<sub>3</sub>), 2.51 (dd,  $J_1 = 16.78$  Hz and  $J_2 = 16.02$  Hz, 2H, CH<sub>2</sub>), 2.83 (s, 2H, CH<sub>2</sub>), 5.77 (s, 1H, CH), 6.84-6.87 (m, 1H, *meso*-ArH), 6.96 (t,  $J = 7.63$  Hz, 2H, ArH), 7.19 (d,  $J = 8.39$  Hz, 2H, ArH), 7.74-7.94 (m, 11H, *meso*-ArH), 8.01-8.05 (m, 2H, ArH), 8.10-8.22 (m, 4H, *meso*-ArH), 8.29-8.34 (m, 4H, *meso*-ArH), 8.40 (d,  $J = 7.63$  Hz, 1H, ArH), 8.47-8.49 (m, 1H, ArH), 8.58 (d,  $J = 8.39$  Hz, 1H, ArH), 8.75 (s, 2H,  $\beta$ -pyrrolic H), 8.92-8.96 (m, 4H,  $\beta$ -pyrrolic H) ppm; <sup>13</sup>C NMR (100 MHz, CDCl<sub>3</sub>)  $\delta_C$ : 27.20, 29.90, 31.76, 32.41, 41.40, 51.30, 115.56, 117.13, 117.92, 118.24, 121.20, 121.28, 121.53, 125.71, 125.82, 125.87, 126.79, 127.12, 127.24, 127.39, 127.43, 127.56, 127.84, 127.97, 128.25, 128.65, 128.86, 129.29, 131.43, 134.04, 134.22, 134.45, 134.57, 134.92, 135.01, 137.24, 138.04, 138.09, 138.71, 139.52, 140.10, 141.76, 141.89, 142.52, 144.59, 144.78, 145.52, 147.03, 150.08, 151.85, 154.84, 155.03, 164.67, 196.76 ppm; UV  $\lambda_{max}$  ( $\epsilon \times 10^{-4}$ , M<sup>-1</sup> cm<sup>-1</sup>): 439 (37.9), 527 (3.8), 567 (0.5), 597 (1.9), 637 (0.1) nm;  $\lambda_{Em}$  (CHCl<sub>3</sub>;  $\lambda_{Ex}$  435 nm): 668, 726 nm; ESI-HRMS (m/z) calcd for C<sub>69</sub>H<sub>49</sub>N<sub>6</sub>O<sub>2</sub>: 993.3912 [M + H]<sup>+</sup>; found 993.3905.

### Characterization data of zinc(II) benzo[*f*]chromeno[2,3-*h*]quinoxalino-porphyrins 14–16

**Zinc(II) benzo[*f*]chromeno[2,3-*h*]quinoxalinoporphyrim 14**, Ar = 4-CH<sub>3</sub>C<sub>6</sub>H<sub>4</sub>, R = C<sub>6</sub>H<sub>5</sub>  
Purple solid; yield: 78%; mp >300°C; IR (CHCl<sub>3</sub>)  $\nu_{max}$ : 758, 796, 1000, 1039, 1175, 1212, 1303, 1340, 1371, 1406, 1450, 1505, 1605, 1653, 2859, 2922, 3021 cm<sup>-1</sup>; <sup>1</sup>H NMR (400 MHz, CDCl<sub>3</sub>)  $\delta_H$ : 1.18 (s, 6H, CH<sub>3</sub>), 2.47(dd,  $J = 15.26$  Hz, 2H, CH<sub>2</sub>), 2.72 (s, 6H, CH<sub>3</sub>), 2.83 (s, 2H, CH<sub>2</sub>), 2.86 (s, 3H, CH<sub>3</sub>), 2.94 (s, 3H, CH<sub>3</sub>), 5.86 (s, 1H, CH), 6.84 (t,  $J = 6.87$  Hz, 1H, ArH), 6.94 (d,  $J = 7.63$  Hz, 2H, ArH), 7.16 (d,  $J = 7.63$  Hz, 2H, ArH), 7.53-7.58 (m, 4H, *meso*-ArH), 7.64 (t,  $J = 6.10$  Hz, 2H, ArH), 7.73-7.79 (m, 4H, *meso*-ArH), 7.99-8.09 (m, 4H, *meso*-ArH), 8.16 (t,  $J = 6.87$  Hz, 3H, *meso*-ArH), 8.26 (d,  $J = 6.87$  Hz, 1H, *meso*-ArH), 8.37 (d,  $J = 7.63$  Hz, 1H, ArH), 8.63 (d,  $J = 7.63$  Hz, 1H, ArH), 8.81 (d,  $J = 4.58$  Hz, 1H,  $\beta$ -pyrrolic H), 8.88 (s, 2H,  $\beta$ -pyrrolic H), 8.92-8.97 (m, 3H,  $\beta$ -pyrrolic H) ppm; <sup>13</sup>C NMR (100 MHz, CDCl<sub>3</sub>)  $\delta_C$ : 21.53, 21.75, 21.94, 27.25, 29.83, 32.15, 32.37, 41.40, 51.28, 115.55, 117.56, 117.92, 118.79, 121.25, 122.99, 123.28, 125.78, 125.96, 127.33, 127.42, 127.62, 127.66, 127.83, 127.94,

128.39, 128.90, 131.33, 131.46, 131.54, 132.02, 132.17, 133.48, 133.76, 134.17, 134.29, 134.47, 136.89, 137.19, 137.21, 137.67, 138.24, 139.00, 139.11, 139.61, 139.63, 140.31, 140.61, 141.04, 144.75, 146.94, 147.81, 149.15, 149.20, 149.79, 149.86, 149.99, 152.36, 153.07, 164.20, 196.26 ppm; UV  $\lambda_{\max}$  ( $\epsilon \times 10^{-4}$ ,  $M^{-1} \text{ cm}^{-1}$ ): 450 (19.0), 574 (2.8), 615 (1.2) nm;  $\lambda_{\text{Em}}$  ( $\text{CHCl}_3$ ;  $\lambda_{\text{Ex}}$  430 nm): 632, 675 nm; ESI-HRMS ( $m/z$ ) calcd for  $\text{C}_{73}\text{H}_{55}\text{N}_6\text{O}_2\text{Zn}$ : 1111.3672  $[\text{M} + \text{H}]^+$ ; found 1111.3694.

**Zinc(II) benzo[*f*]chromeno[2,3-*h*]quinoxalinoporphyrin 15**, Ar = 4- $\text{CH}_3\text{C}_6\text{H}_4$ , R = 4- $\text{OCH}_3\text{C}_6\text{H}_4$

Purple solid; yield: 80%; mp  $>300^\circ\text{C}$ ; IR ( $\text{CHCl}_3$ )  $\nu_{\max}$ : 759, 796, 1001, 1039, 1175, 1213, 1340, 1371, 1454, 1509, 1607, 1651, 2858, 2923, 3019  $\text{cm}^{-1}$ ;  $^1\text{H}$  NMR (400 MHz,  $\text{CDCl}_3$ )  $\delta_{\text{H}}$ : 1.16 (s, 3H,  $\text{CH}_3$ ), 1.25 (s, 3H,  $\text{CH}_3$ ), 2.45 (dd,  $J = 15.26$ , 2H,  $\text{CH}_2$ ), 2.71 (s, 6H,  $\text{CH}_3$ ), 2.81 (s, 2H,  $\text{CH}_2$ ), 2.86 (s, 3H,  $\text{CH}_3$ ), 2.93 (s, 3H,  $\text{CH}_3$ ), 3.46 (s, 3H,  $\text{OCH}_3$ ), 5.77 (s, 1H, CH), 6.46 (d,  $J = 9.16$  Hz, 2H, ArH), 7.07 (d,  $J = 8.39$  Hz, 2H, ArH), 7.52-7.63 (m, 6H, *meso*-ArH, ArH), 7.73-7.82 (m, 3H, *meso*-ArH), 7.96-8.19 (m, 8H, *meso*-ArH), 8.28 (d,  $J = 8.39$  Hz, 1H, ArH), 8.38 (d,  $J = 7.63$  Hz, 1H, ArH), 8.65 (d,  $J = 8.39$  Hz, 1H, ArH), 8.81 (d,  $J = 4.58$  Hz, 1H,  $\beta$ -pyrrolic H), 8.86 (s, 2H,  $\beta$ -pyrrolic H), 8.91-8.95 (m, 3H,  $\beta$ -pyrrolic H) ppm;  $^{13}\text{C}$  NMR (100 MHz,  $\text{CDCl}_3$ )  $\delta_{\text{C}}$ : 21.53, 21.73, 21.91, 27.24, 29.84, 31.39, 32.36, 41.36, 51.24, 54.82, 112.74, 115.63, 117.53, 118.11, 118.71, 121.15, 122.95, 123.22, 125.73, 125.88, 127.32, 127.49, 127.59, 127.63, 127.84, 127.88, 128.80, 129.37, 131.32, 131.34, 131.43, 131.52, 131.97, 132.15, 133.45, 133.78, 134.17, 134.23, 134.31, 134.56, 136.83, 137.15, 137.18, 137.23, 137.64, 138.25, 139.06, 139.08, 139.62, 140.30, 140.60, 141.00, 146.68, 147.78, 149.11, 149.17, 149.77, 149.82, 149.95, 152.34, 153.03, 157.40, 163.92, 196.33 ppm; UV  $\lambda_{\max}$  ( $\epsilon \times 10^{-4}$ ,  $M^{-1} \text{ cm}^{-1}$ ): 428 (18.5), 451 (19.0), 574 (2.8), 618 (1.2) nm;  $\lambda_{\text{Em}}$  ( $\text{CHCl}_3$ ;  $\lambda_{\text{Ex}}$  435 nm): 625, 677 nm; ESI-HRMS ( $m/z$ ) calcd for  $\text{C}_{74}\text{H}_{57}\text{N}_6\text{O}_3\text{Zn}$ : 1141.3778  $[\text{M} + \text{H}]^+$ ; found 1141.3775.

**Zinc(II) benzo[*f*]chromeno[2,3-*h*]quinoxalinoporphyrin 16**, Ar =  $\text{C}_6\text{H}_5$ , R =  $\text{C}_6\text{H}_5$

Purple solid; yield: 80%; mp  $>300^\circ\text{C}$ ; IR ( $\text{CHCl}_3$ )  $\nu_{\max}$ : 698, 750, 795, 831, 999, 1069, 1173, 1211, 1338, 1444, 1483, 1597, 1652, 2852, 2920, 2954, 3020, 3056  $\text{cm}^{-1}$ ;  $^1\text{H}$  NMR (400 MHz,  $\text{CDCl}_3$ )  $\delta_{\text{H}}$ : 1.24 (s, 3H, methyl H), 1.19 (s, 3H, methyl H), 2.48 (dd,  $J = 16.78$ , 2H,  $\text{CH}_2$ ), 2.84 (s, 2H,  $\text{CH}_2$ ), 5.81 (s, 1H, CH), 6.85 (t,  $J = 7.63$  Hz, 1H, ArH), 6.96 (t,  $J = 7.63$  Hz, 2H, ArH), 7.19 (d,  $J = 7.63$  Hz, 2H, ArH), 7.73-7.84 (m, 10H, *meso*-ArH), 7.91-7.96 (m, 2H, *meso*-ArH), 8.01 (t,  $J = 7.63$  Hz, 1H, ArH), 8.08-8.22 (m, 5H, *meso*-ArH), 8.26-8.30 (m, 3H, *meso*-ArH), 8.39 (d,  $J = 7.63$  Hz, 2H, ArH), 8.61 (d,  $J = 7.63$  Hz, 1H, ArH), 8.86-8.88 (m, 4H,  $\beta$ -pyrrolic H), 8.92-8.95 (m, 2H,  $\beta$ -pyrrolic H) ppm;  $^{13}\text{C}$  NMR (100 MHz,  $\text{CDCl}_3$ )  $\delta_{\text{C}}$ : 27.18, 31.75, 32.40,

41.38, 51.26, 115.61, 117.60, 117.84, 118.83, 121.21, 122.99, 123.26, 125.75, 125.89, 125.99, 126.58, 126.97, 127.01, 127.12, 127.28, 127.47, 127.55, 127.60, 128.28, 129.00, 131.32, 131.43, 131.54, 131.63, 132.06, 132.13, 132.24, 133.59, 133.88, 134.09, 134.21, 134.31, 134.47, 137.63, 139.06, 140.55, 141.02, 141.86, 142.54, 143.28, 144.54, 147.19, 147.87, 149.11, 149.77, 149.89, 152.37, 152.82, 164.70, 196.77 ppm; UV  $\lambda_{\max}$  ( $\epsilon \times 10^{-4}$ ,  $M^{-1} \text{ cm}^{-1}$ ): 449 (15.4), 572 (2.4), 613 (1.0) nm;  $\lambda_{\text{Em}}$  ( $\text{CHCl}_3$ ;  $\lambda_{\text{Ex}}$  440 nm): 623, 678 nm; ESI-HRMS (m/z) calcd for  $\text{C}_{69}\text{H}_{47}\text{N}_6\text{O}_2\text{Zn}$ : 1055.3046  $[\text{M} + \text{H}]^+$ ; found 1055.3046.

**Characterization data of copper(II) benzo[*f*]quinoxalinoporphyrin 17, Ar = 4- $\text{CH}_3\text{C}_6\text{H}_4$**   
Purple solid; yield: 67%; mp  $>300^\circ\text{C}$ ; IR ( $\text{CHCl}_3$ )  $\nu_{\max}$ : 796, 1004, 1183, 1222, 1346, 1453, 1511, 1604, 1689, 2856, 2923, 3023  $\text{cm}^{-1}$ ; UV  $\lambda_{\max}$  ( $\epsilon \times 10^{-4}$ ,  $M^{-1} \text{ cm}^{-1}$ ): 441 (13.8), 559 (3.0), 600 (1.4) nm; ESI-HRMS (m/z) calcd for  $\text{C}_{58}\text{H}_{41}\text{CuN}_6\text{O}$ : 900.2632  $[\text{M} + \text{H}]^+$ ; found 900.2635.



# $^1\text{H}$ and $^{13}\text{C}$ NMR spectra of free-base and zinc(II) porphyrins 9–16

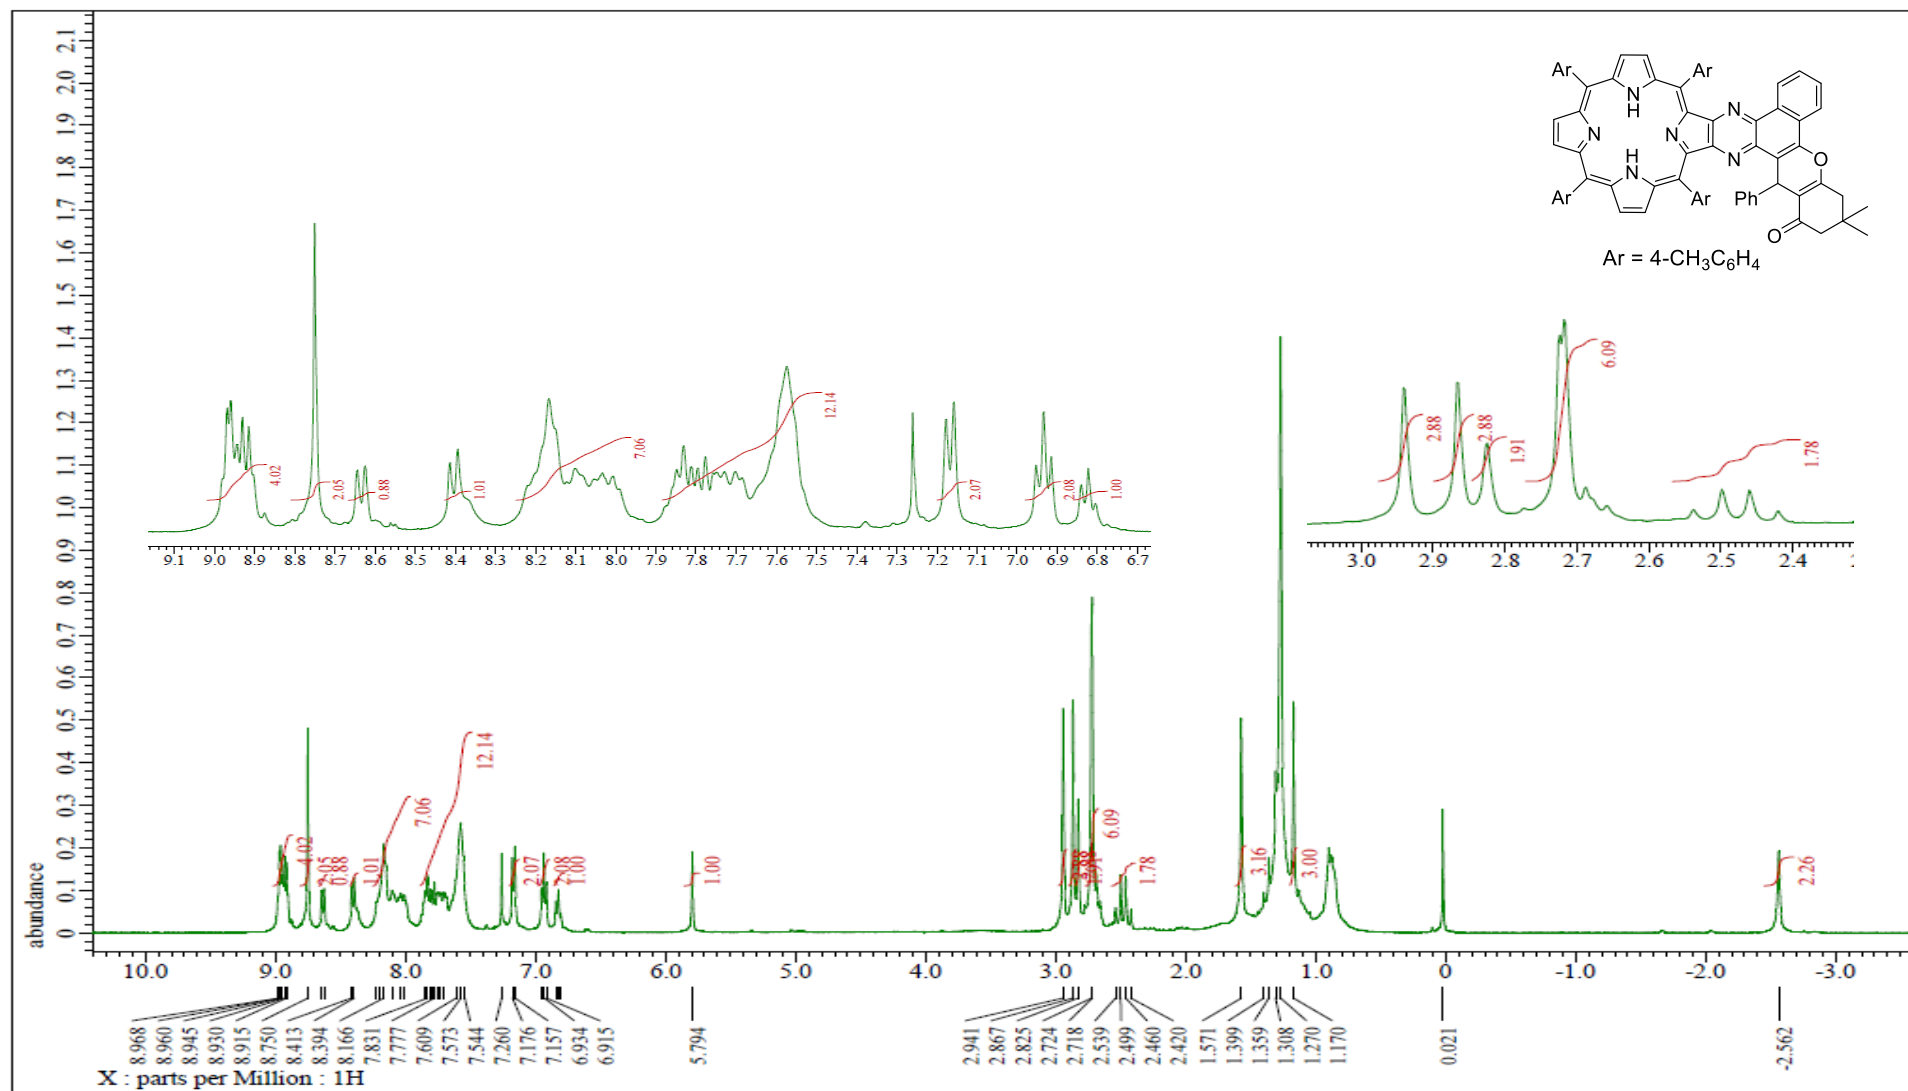

Figure 1.  $^1\text{H}$  NMR spectrum of porphyrin 9 in CDCl<sub>3</sub>.

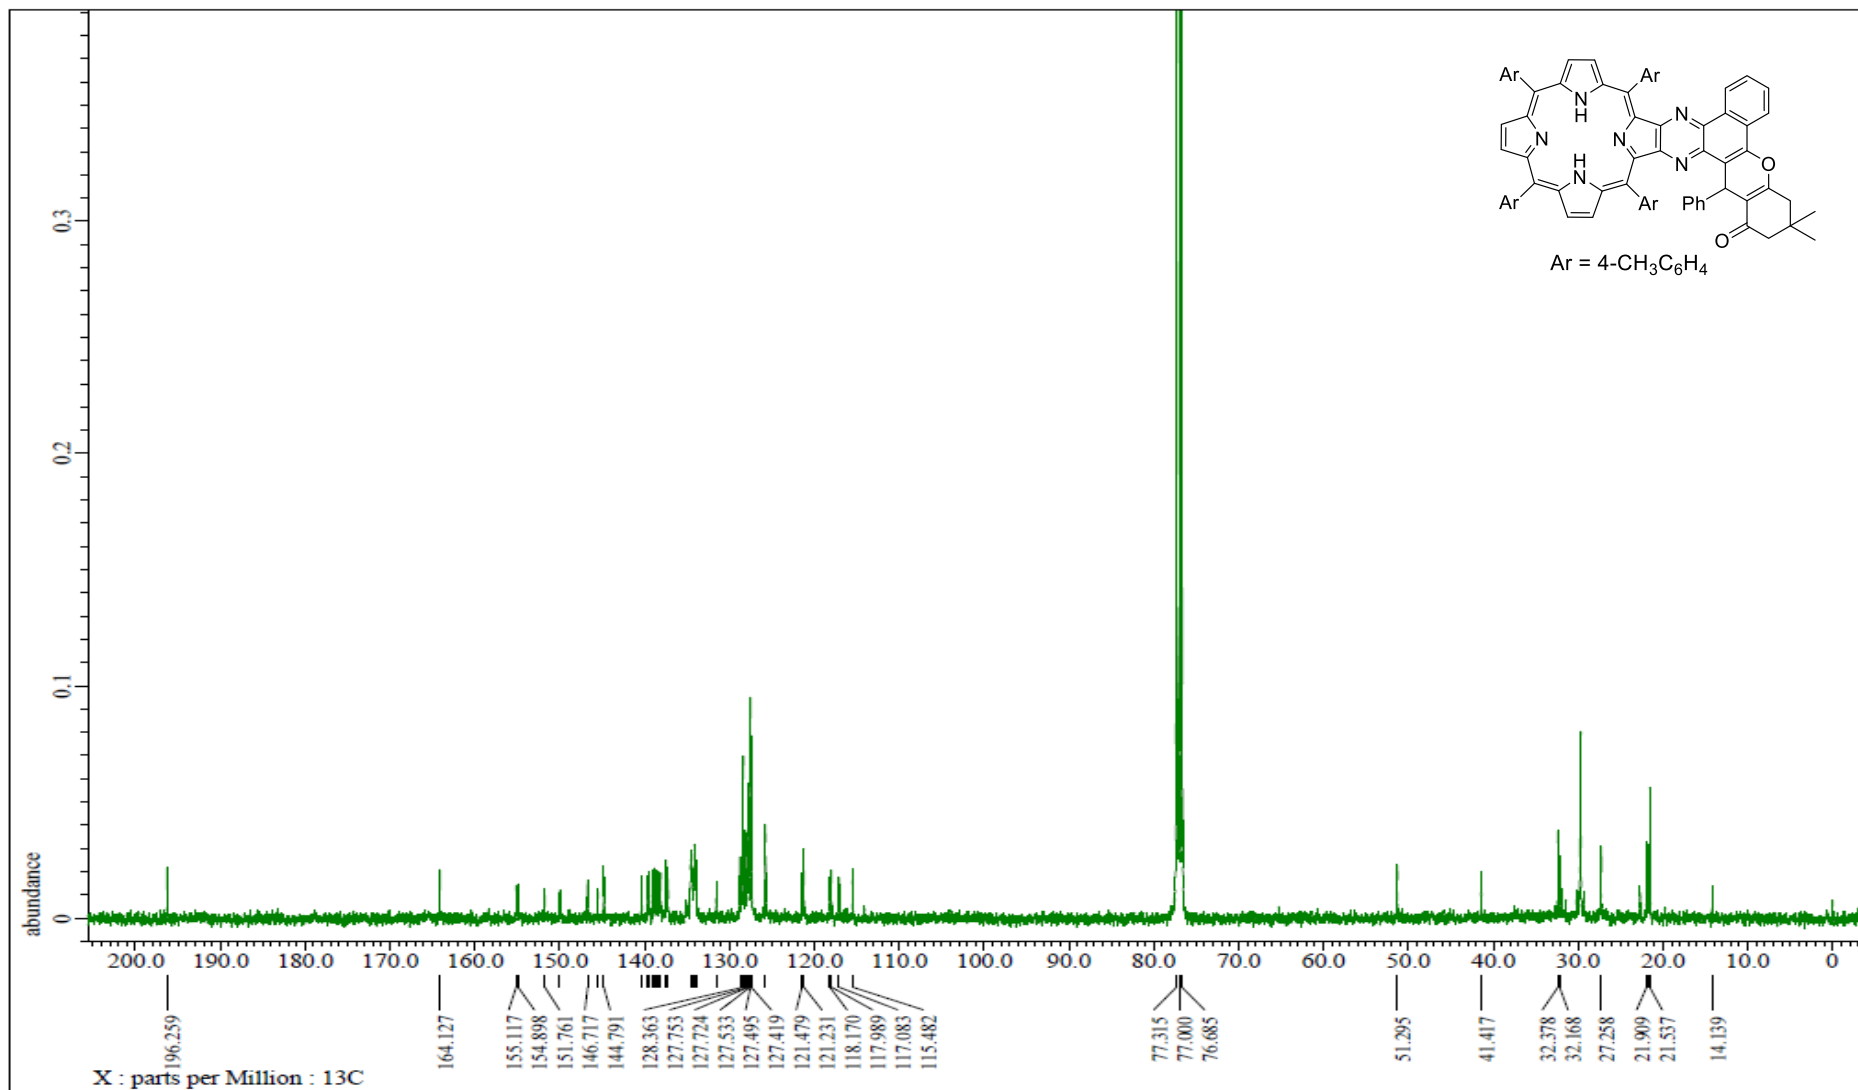

**Figure 2.** <sup>13</sup>C NMR spectrum of porphyrin **9** in CDCl<sub>3</sub>.

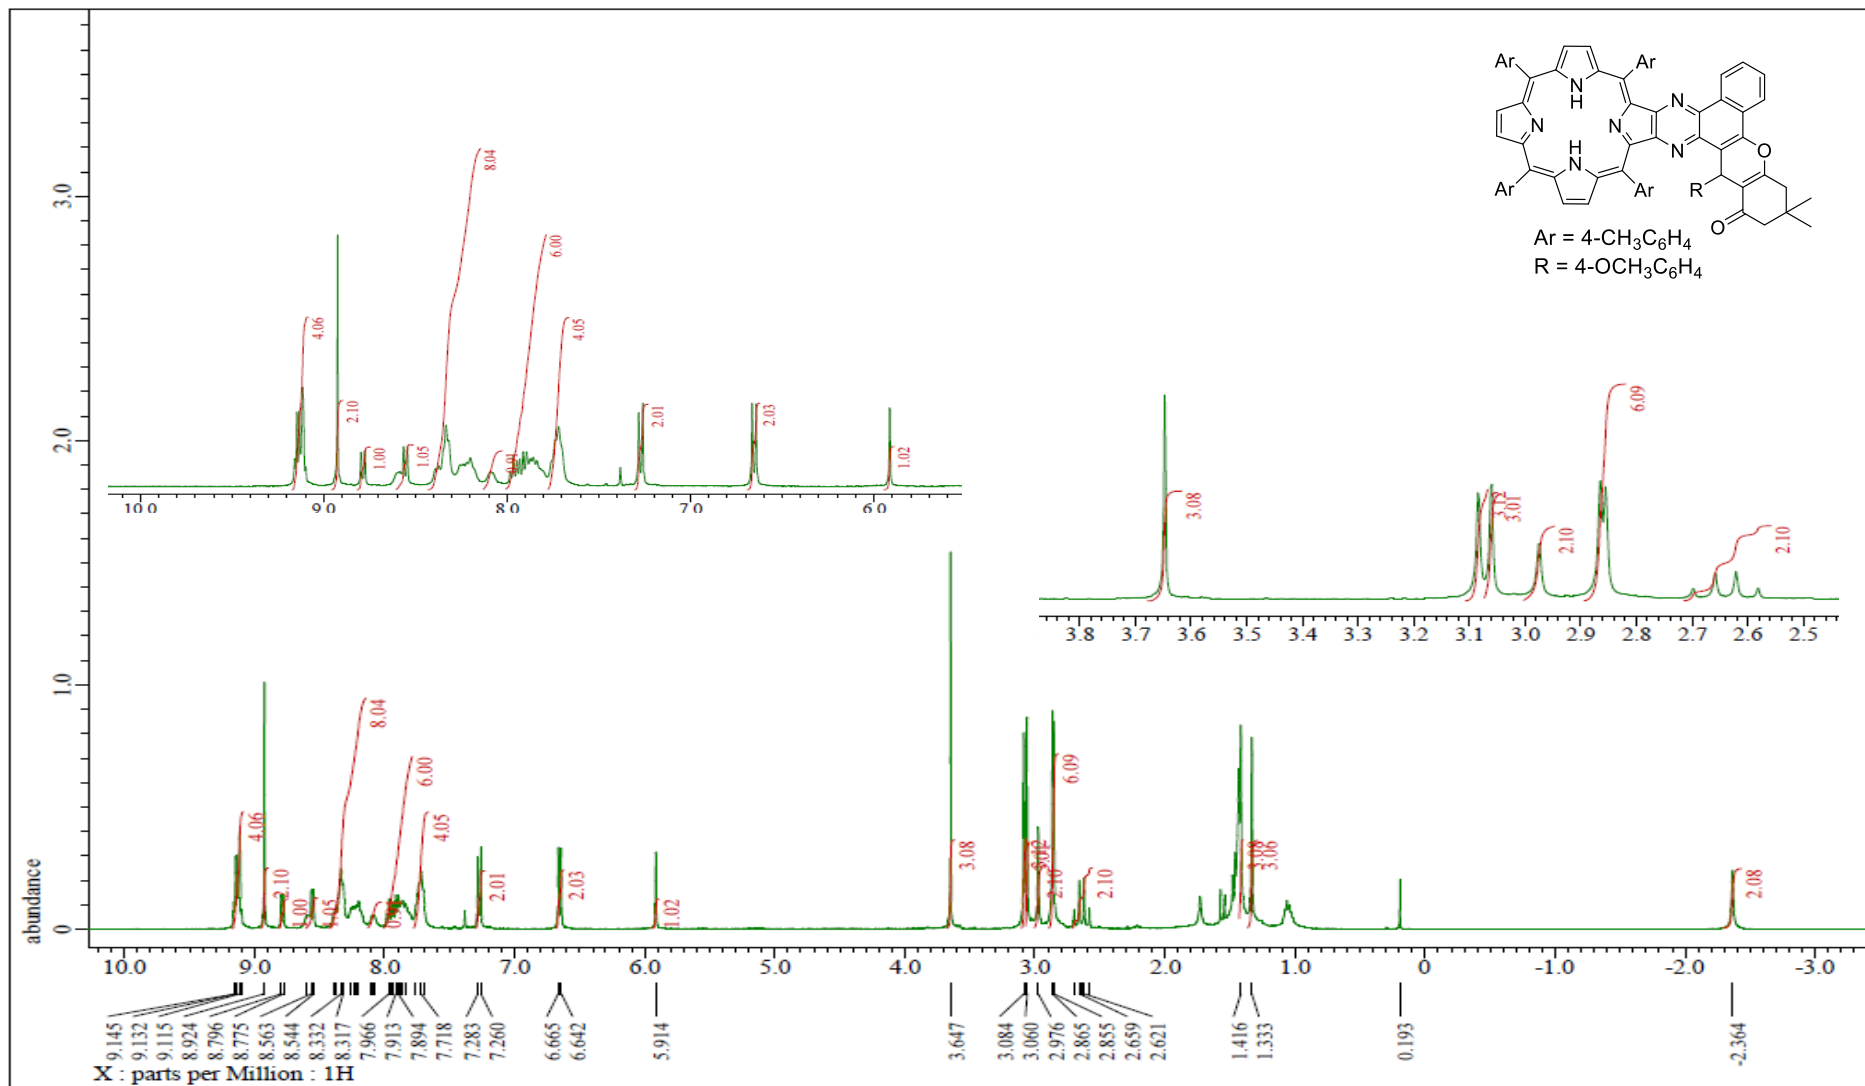

Figure 3. <sup>1</sup>H NMR spectrum of porphyrin 10 in CDCl<sub>3</sub>.

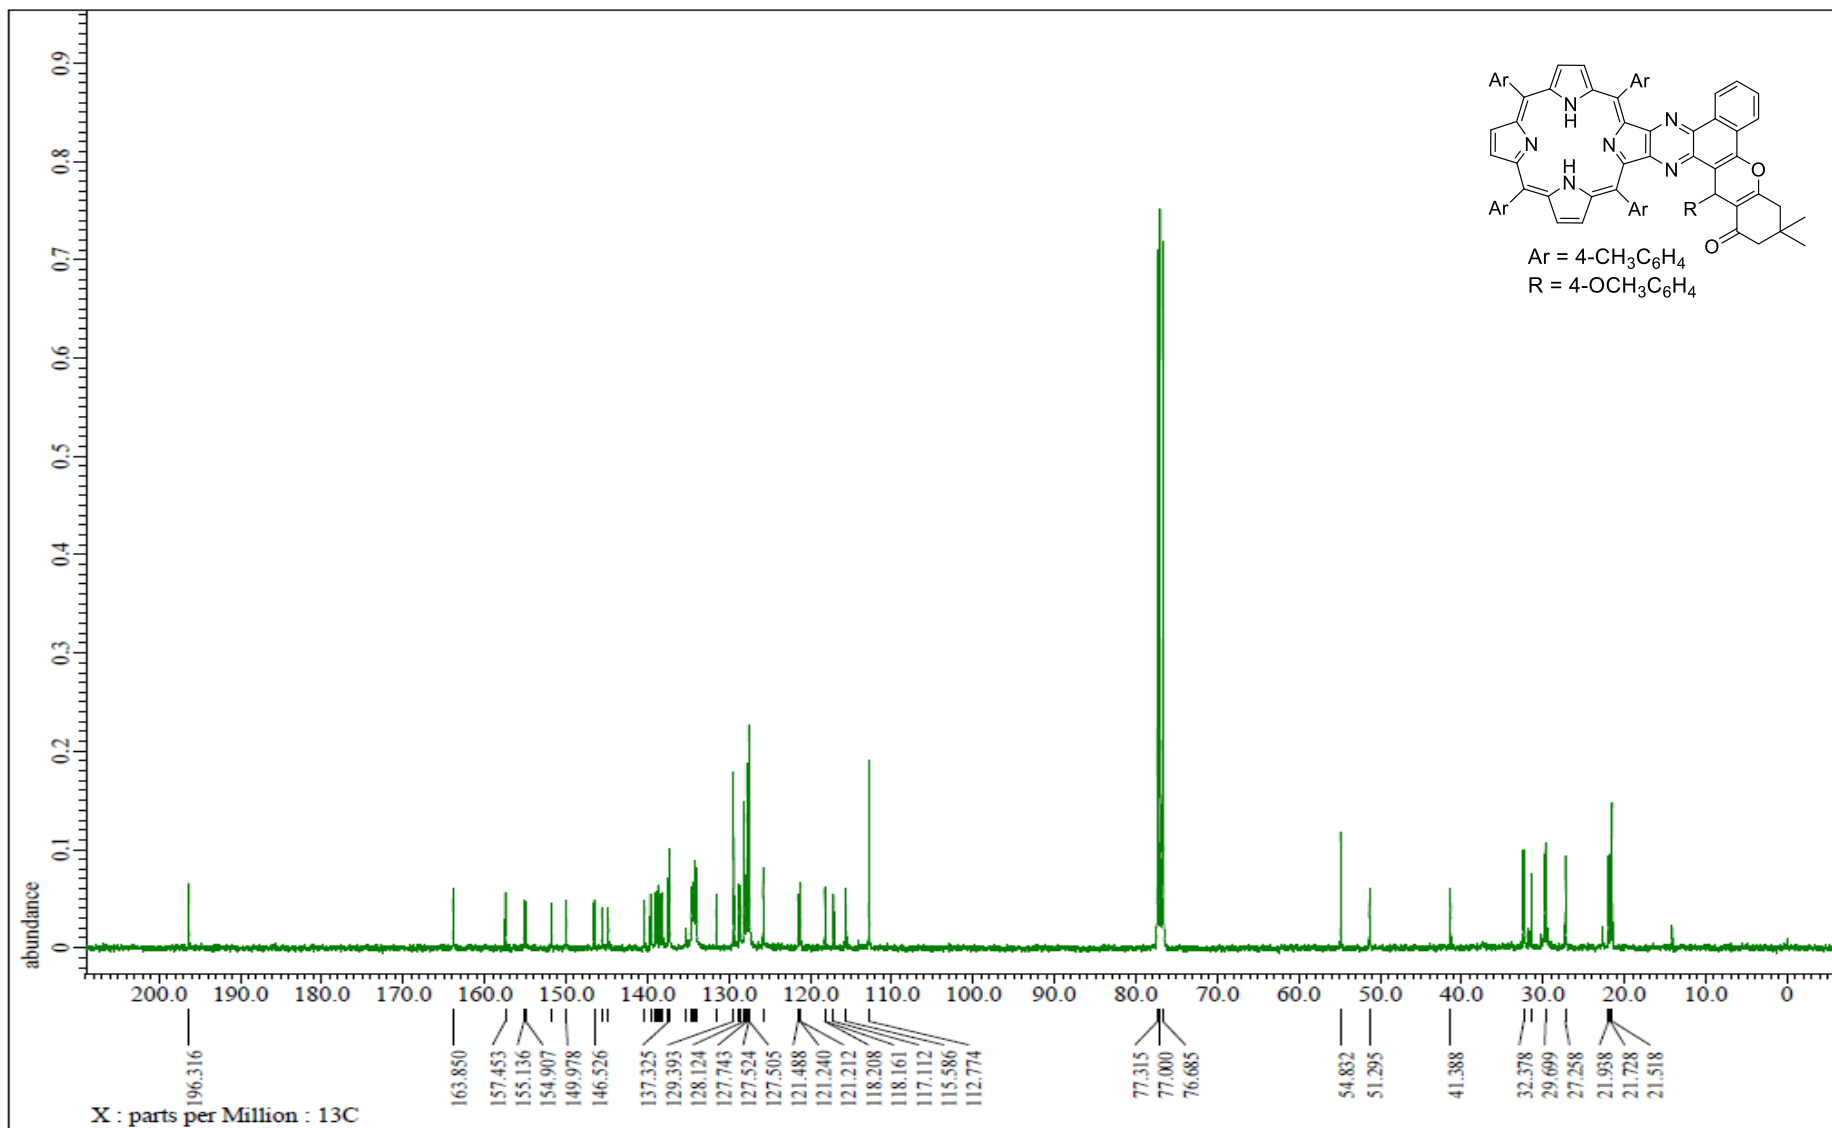

**Figure 4.** <sup>13</sup>C NMR spectrum of porphyrin **10** in CDCl<sub>3</sub>.

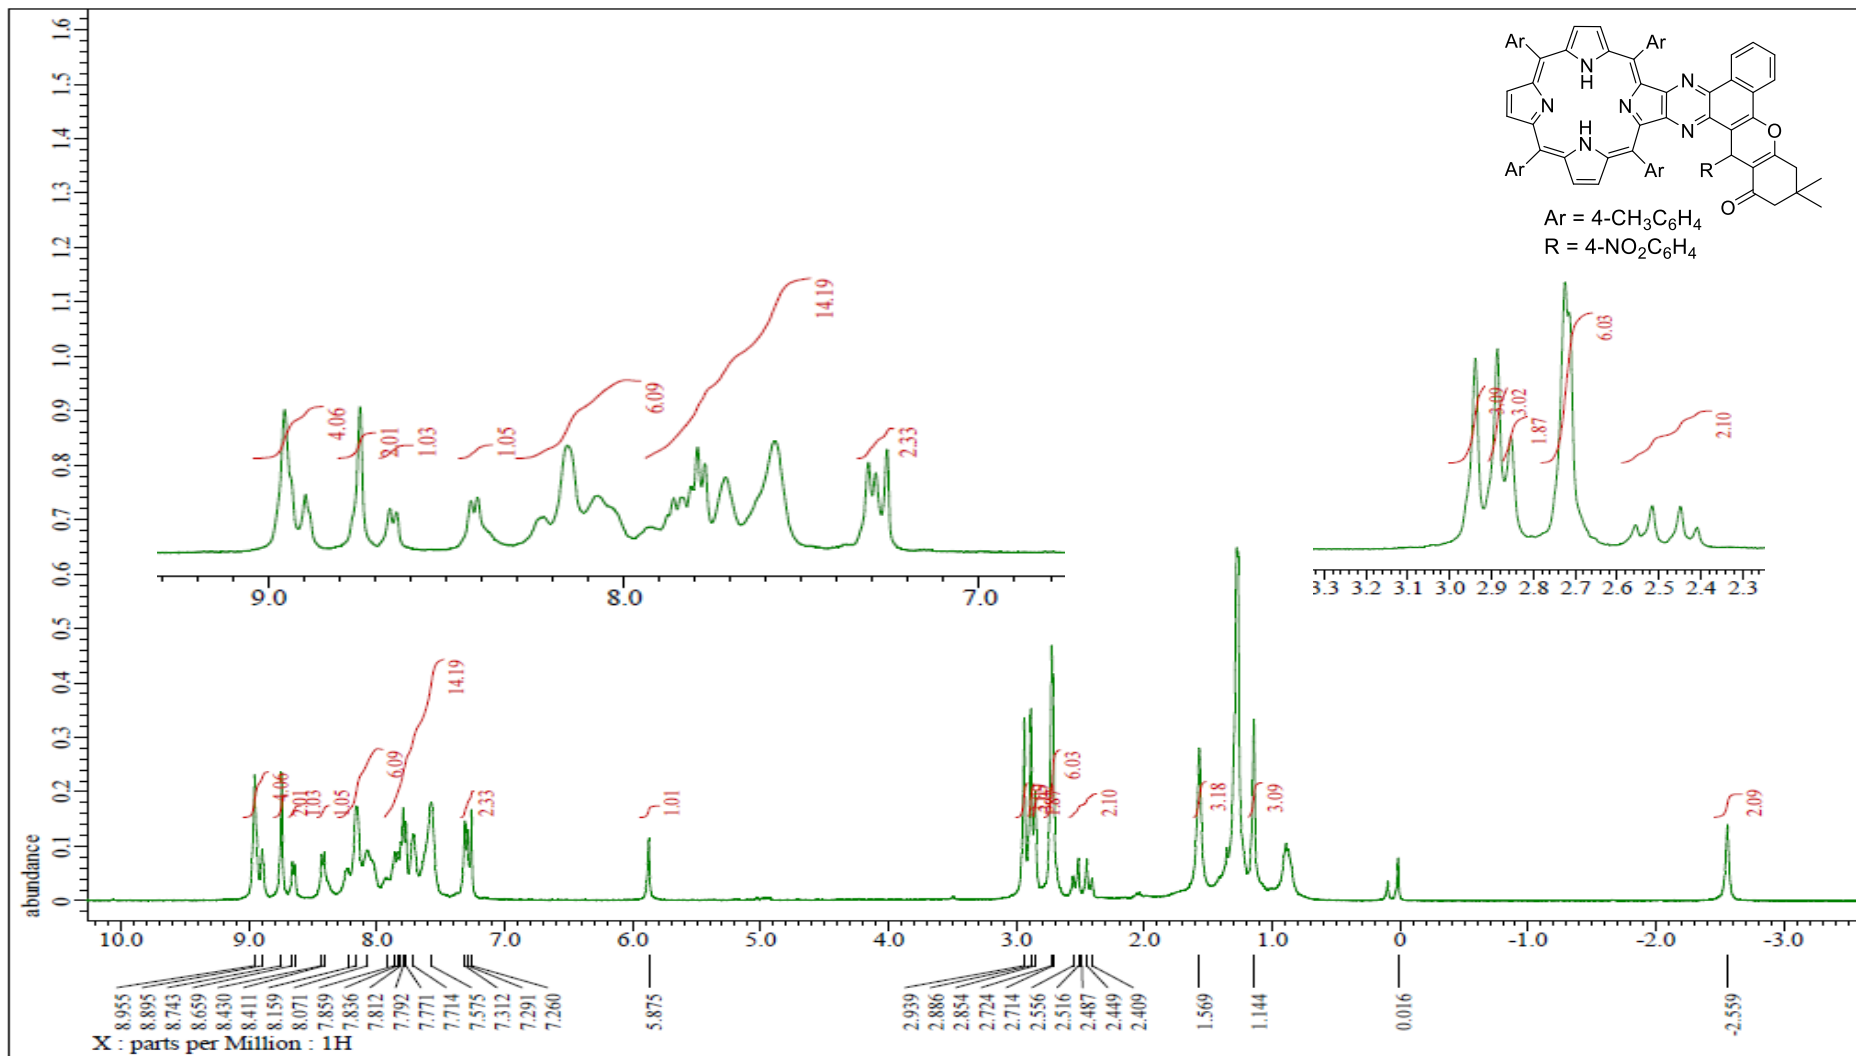

Figure 5. <sup>1</sup>H NMR spectrum of porphyrin **11** in CDCl<sub>3</sub>.

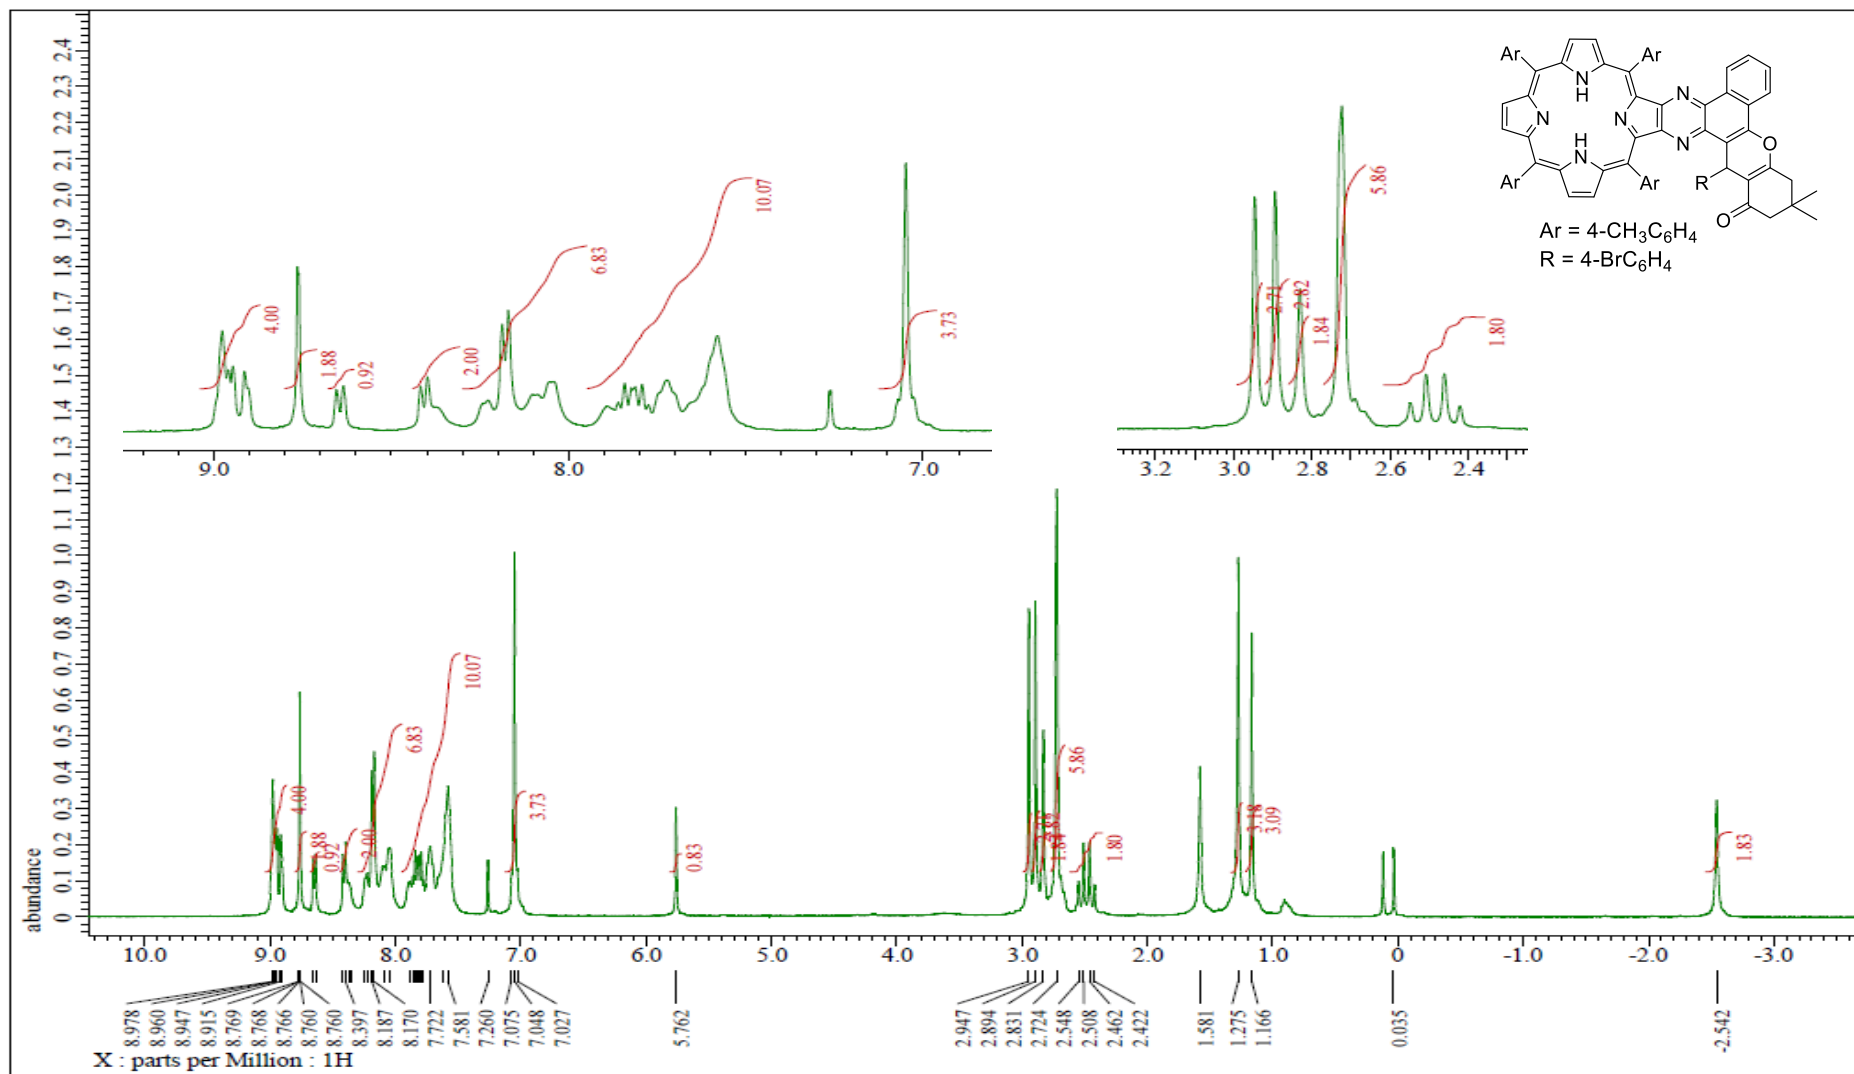

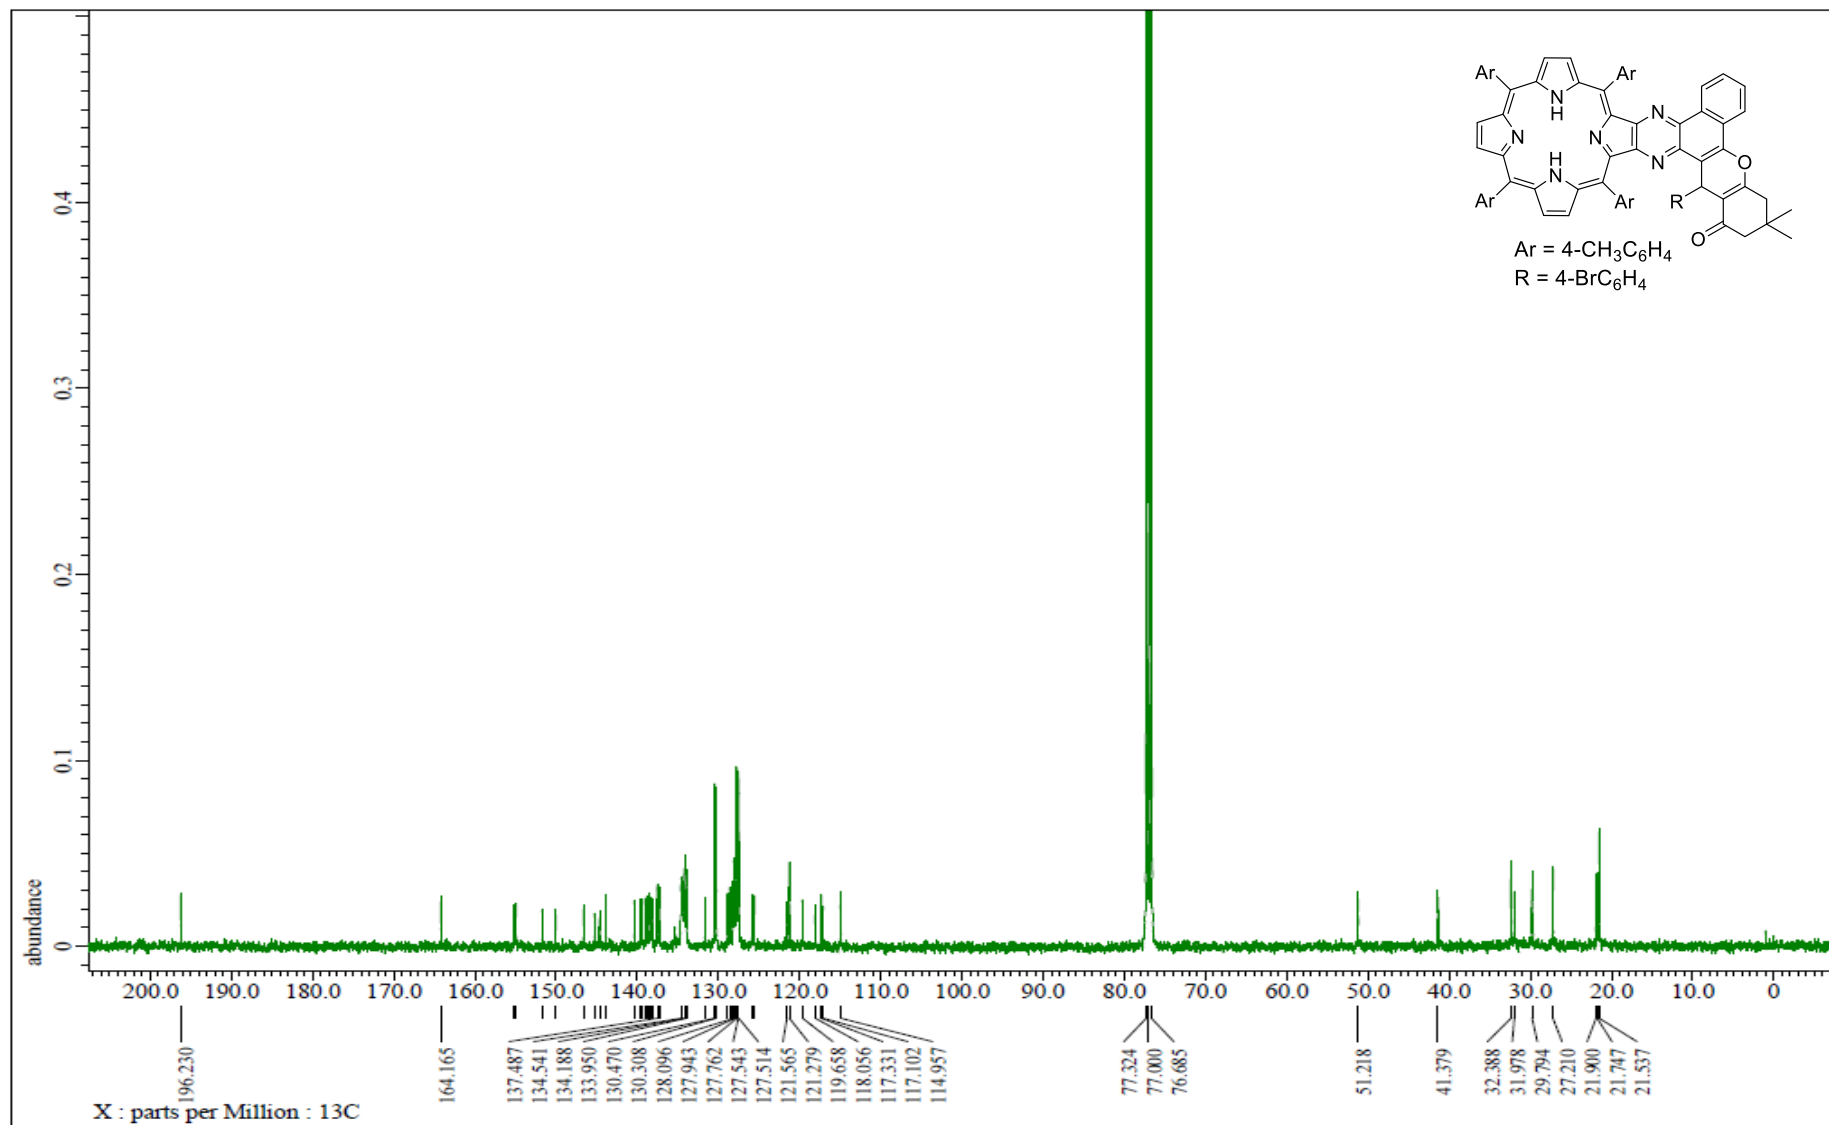

**Figure 7.** <sup>13</sup>C NMR spectrum of porphyrin **12** in CDCl<sub>3</sub>.

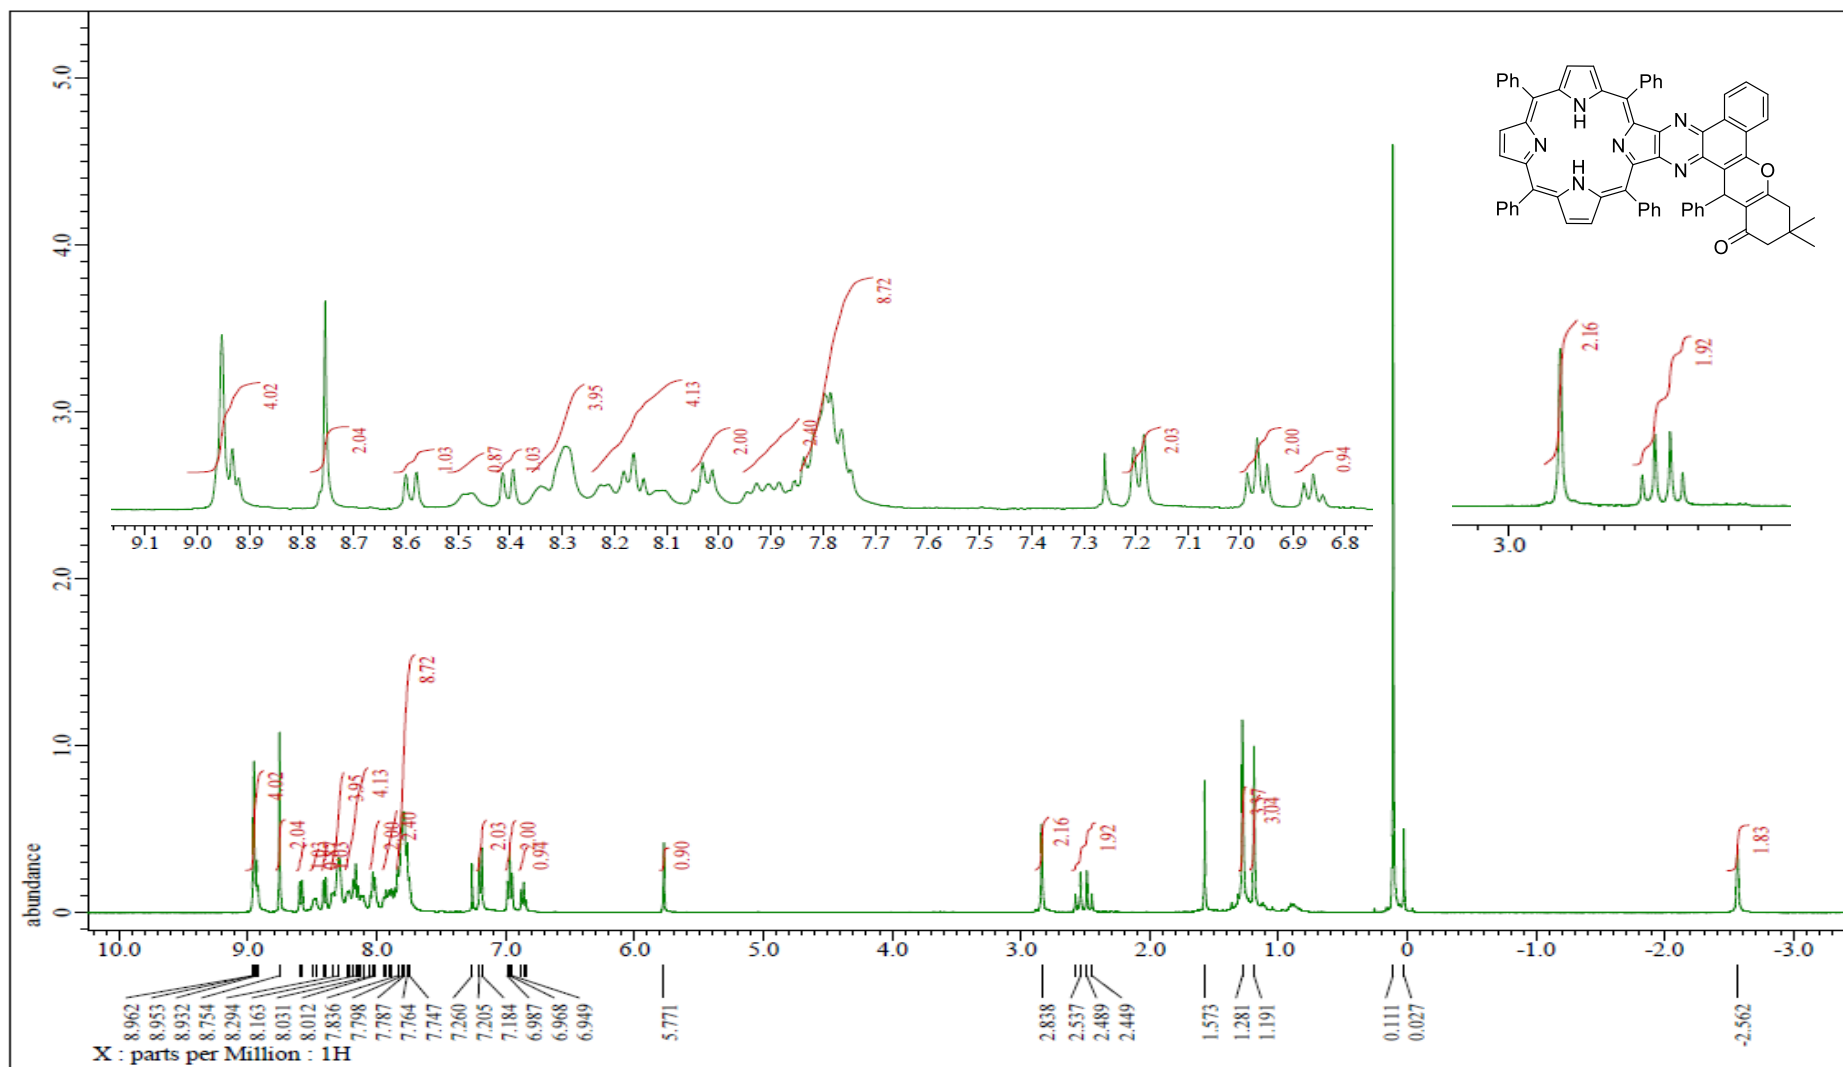

Figure 8.  $^1\text{H}$  NMR spectrum of porphyrin **13** in  $\text{CDCl}_3$ .



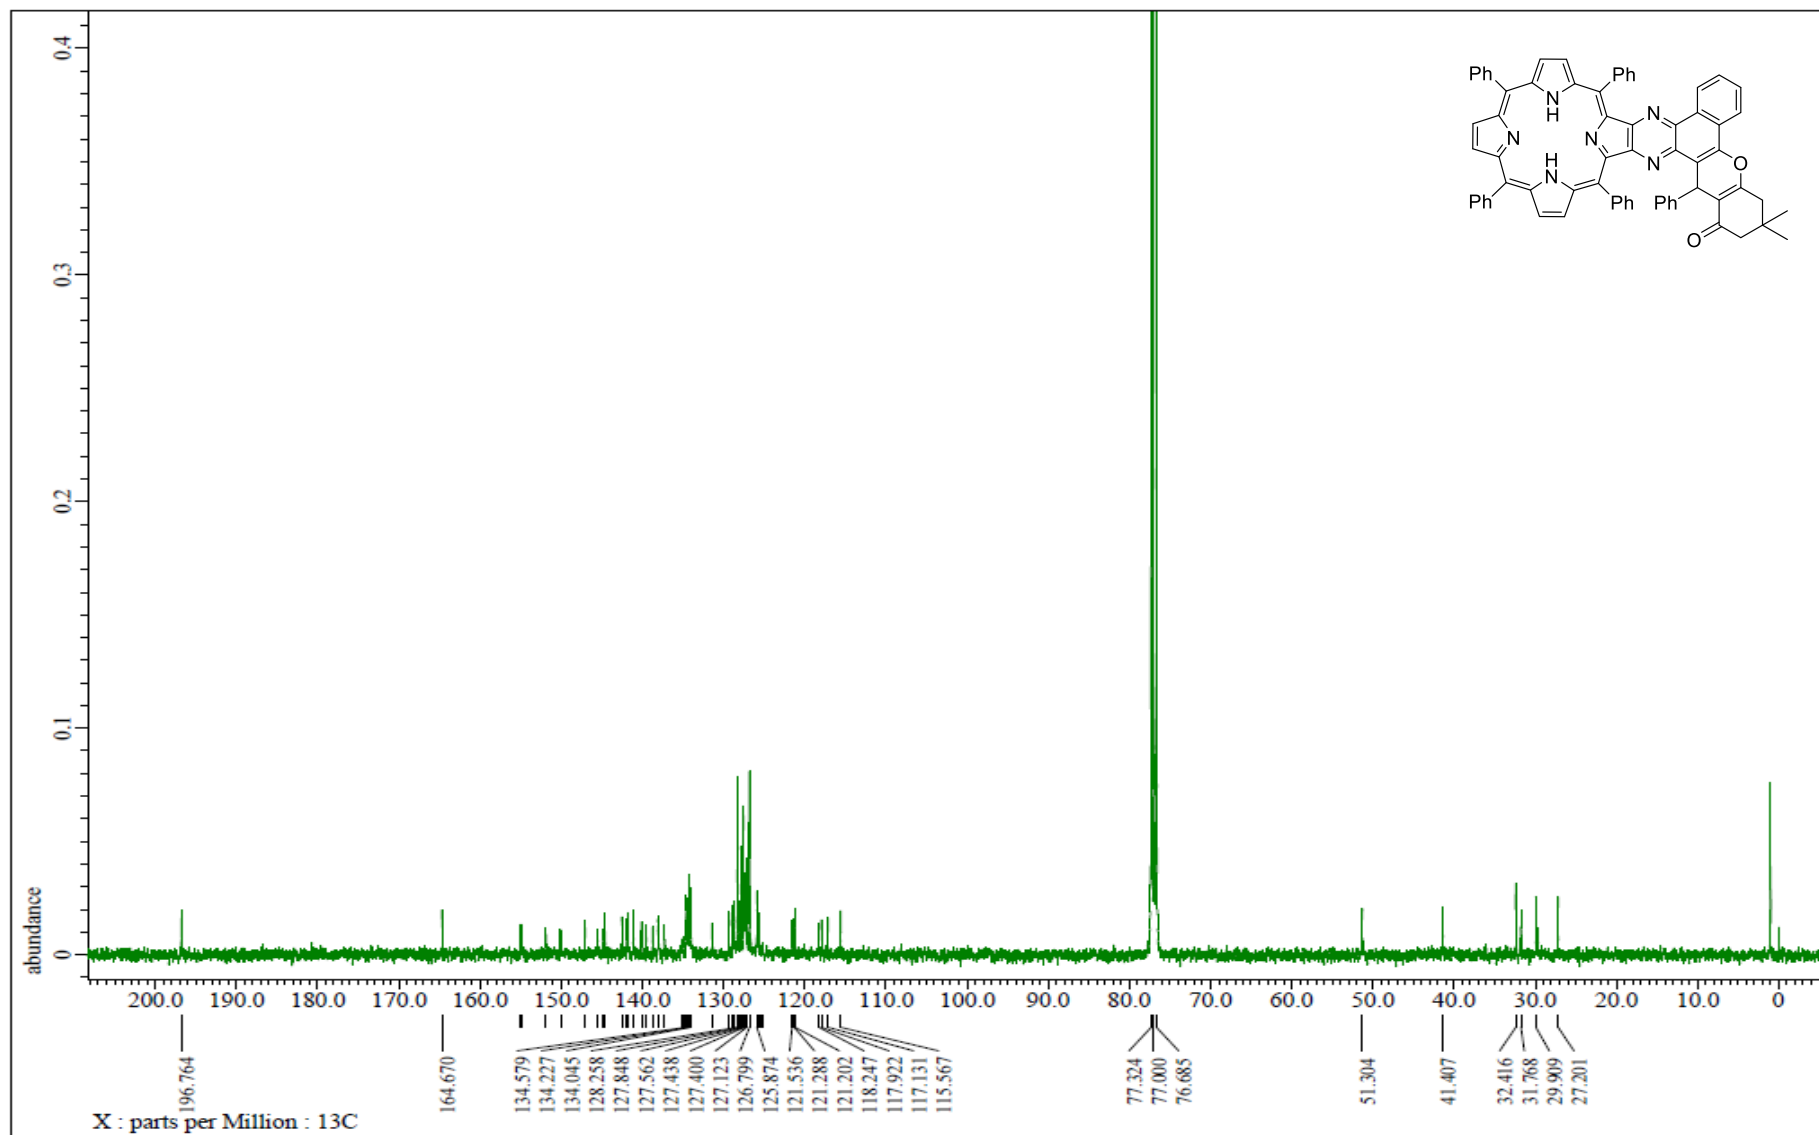

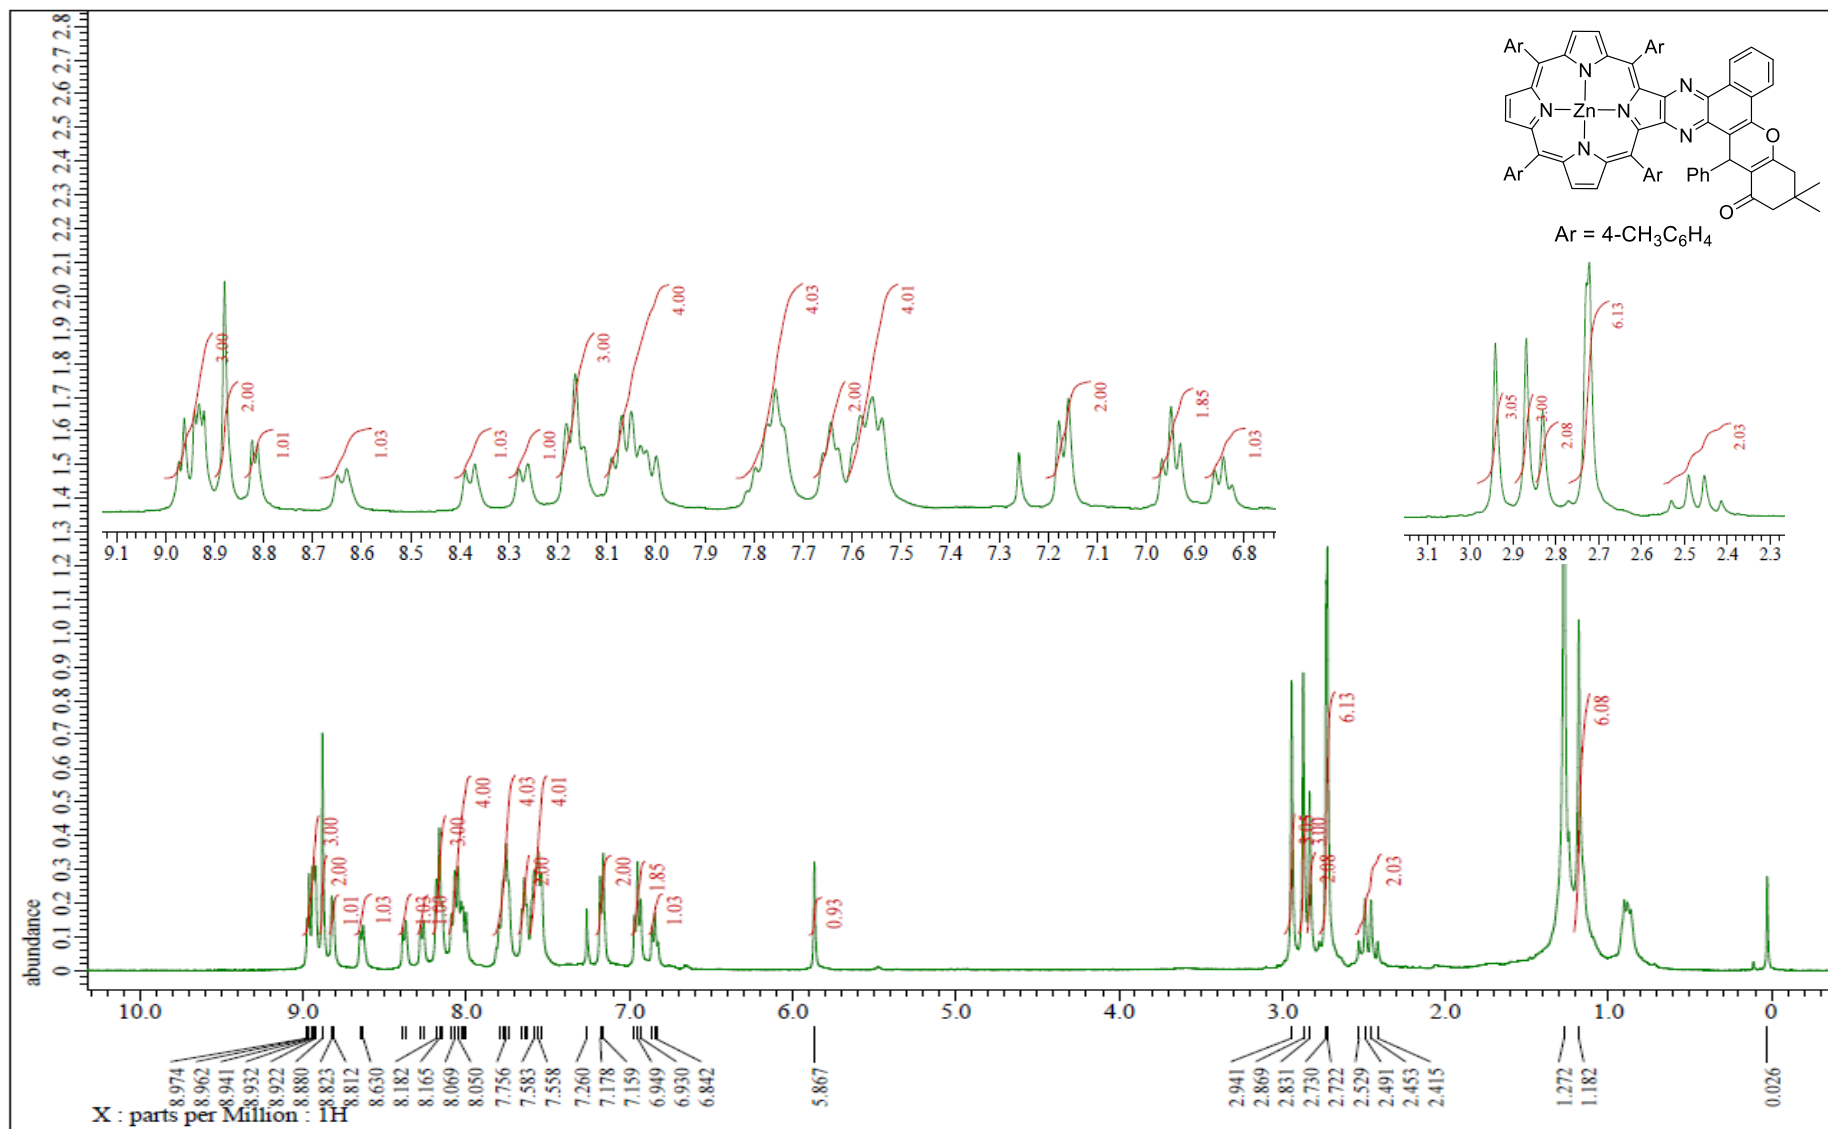

Figure 10. <sup>1</sup>H NMR spectrum of porphyrin 14 in CDCl<sub>3</sub>.

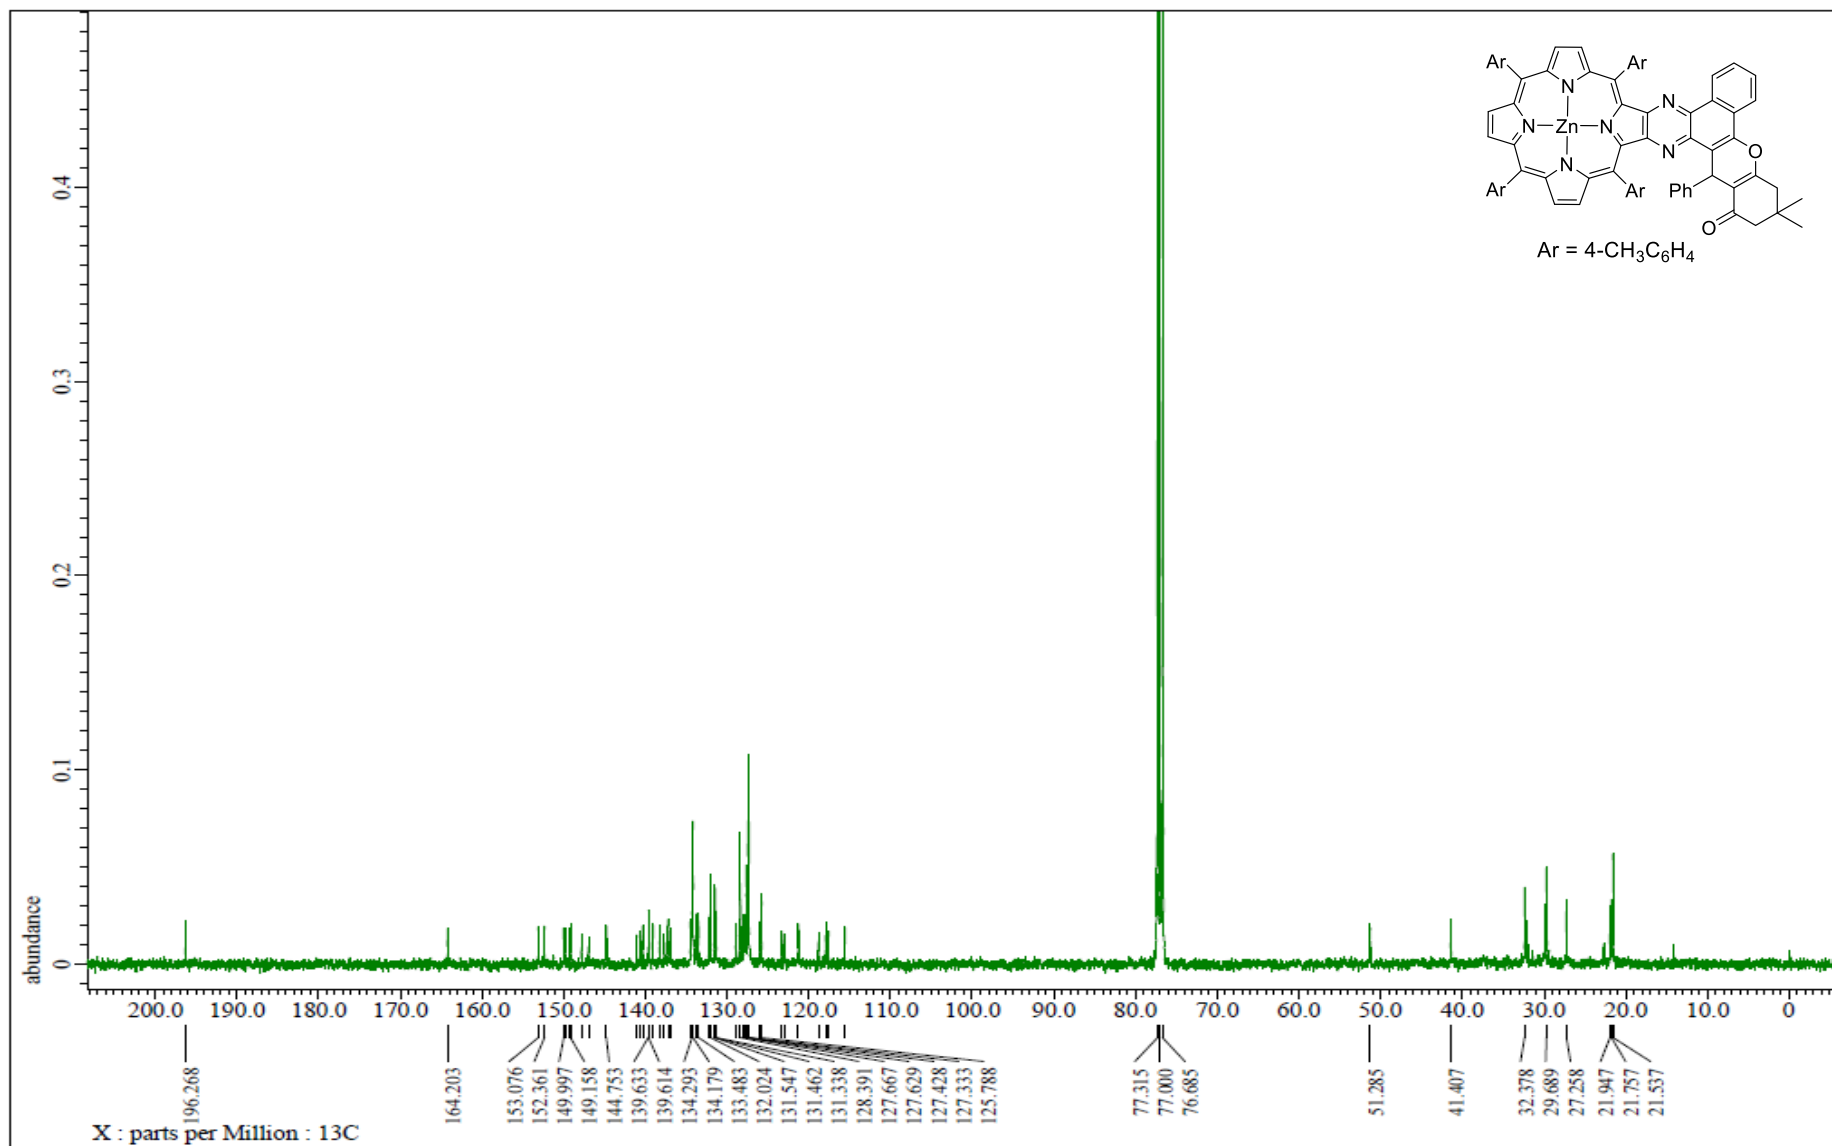

**Figure 11.** <sup>13</sup>C NMR spectrum of porphyrin **14** in CDCl<sub>3</sub>.

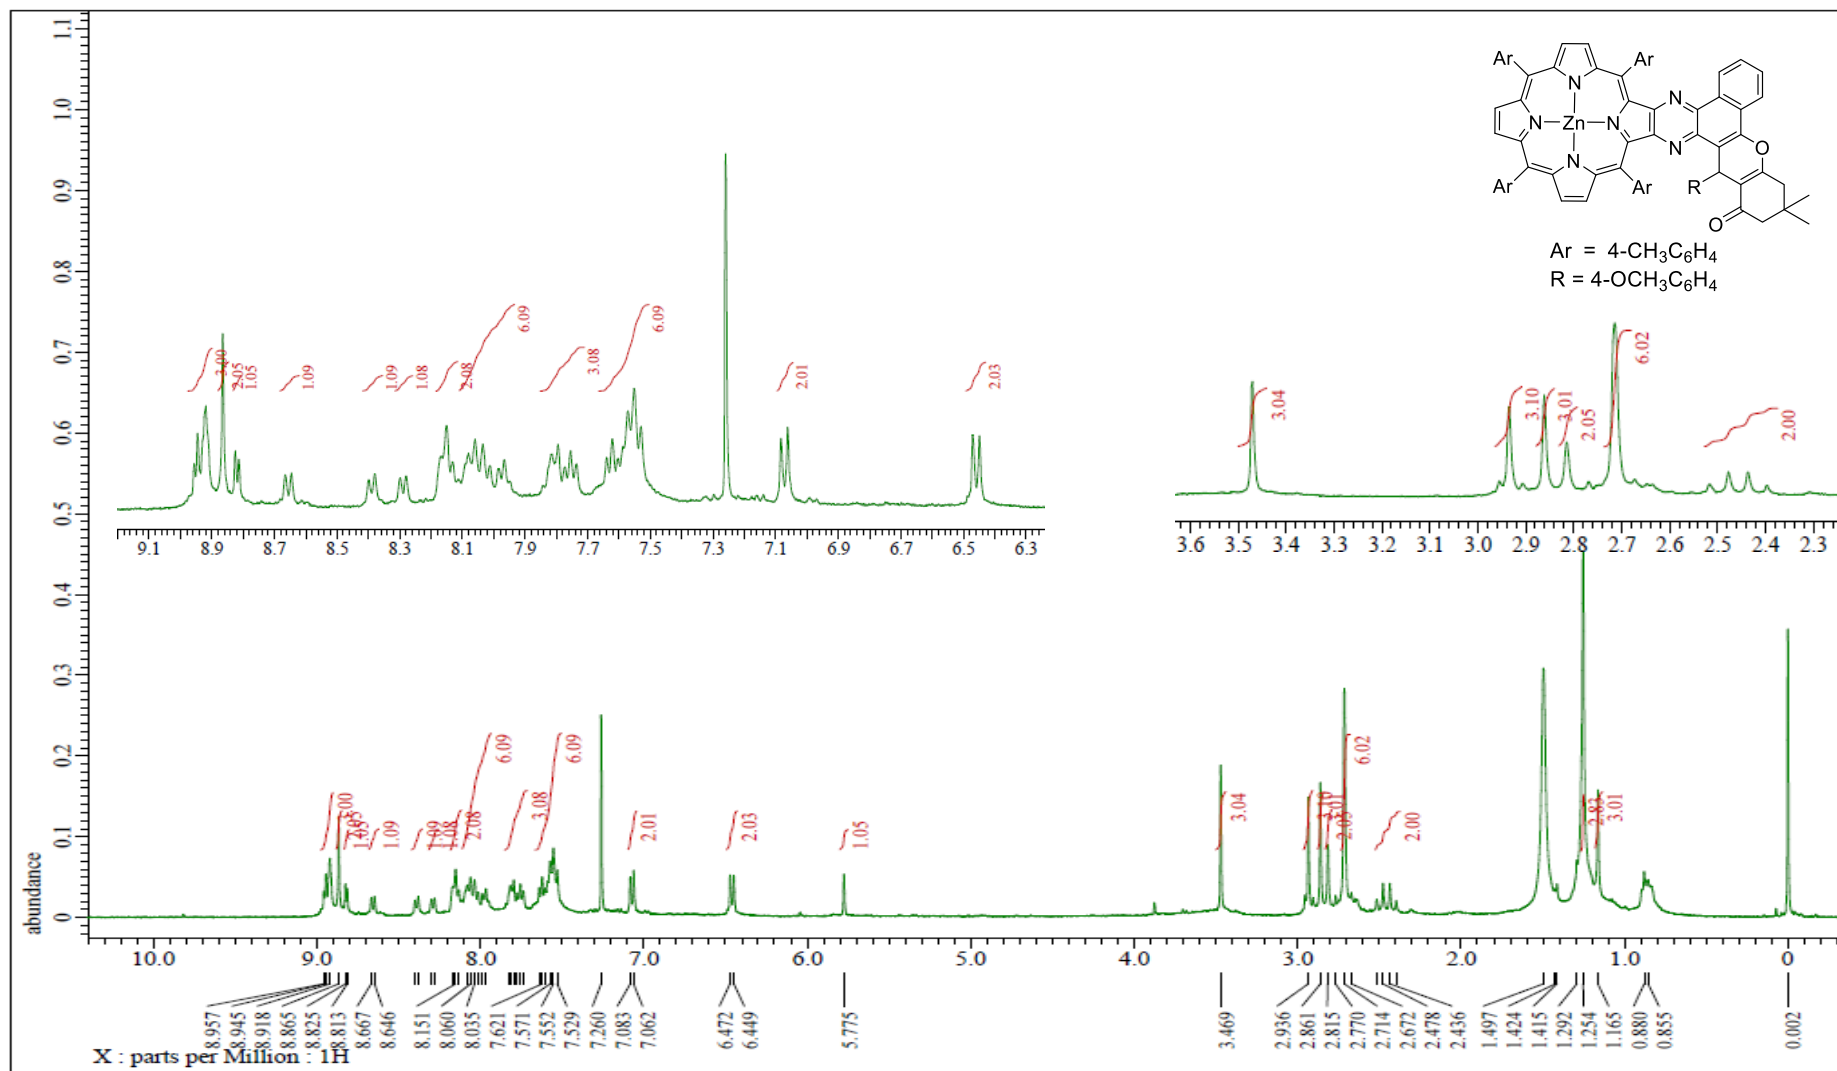

Figure 12. <sup>1</sup>H NMR spectrum of porphyrin **15** in CDCl<sub>3</sub>.

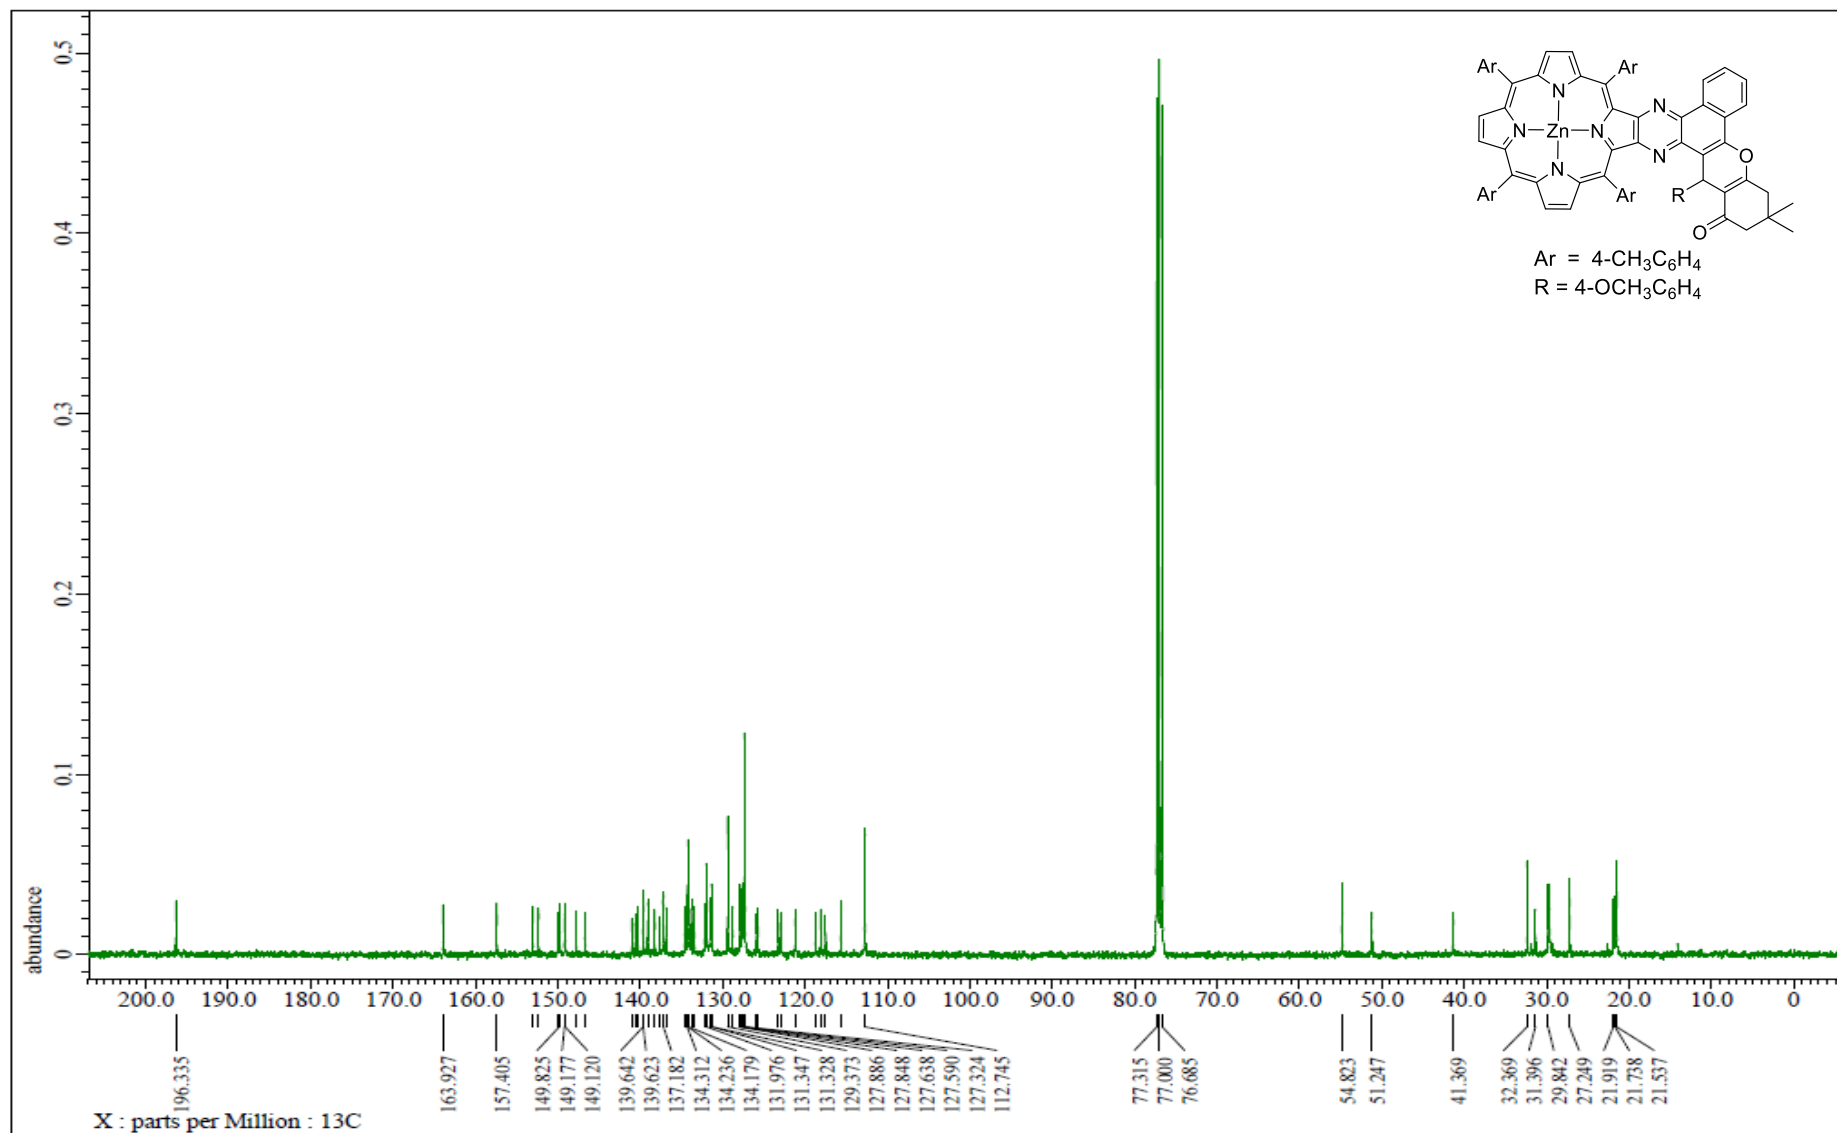

**Figure 13.** <sup>13</sup>C NMR spectrum of porphyrin **15** in CDCl<sub>3</sub>.

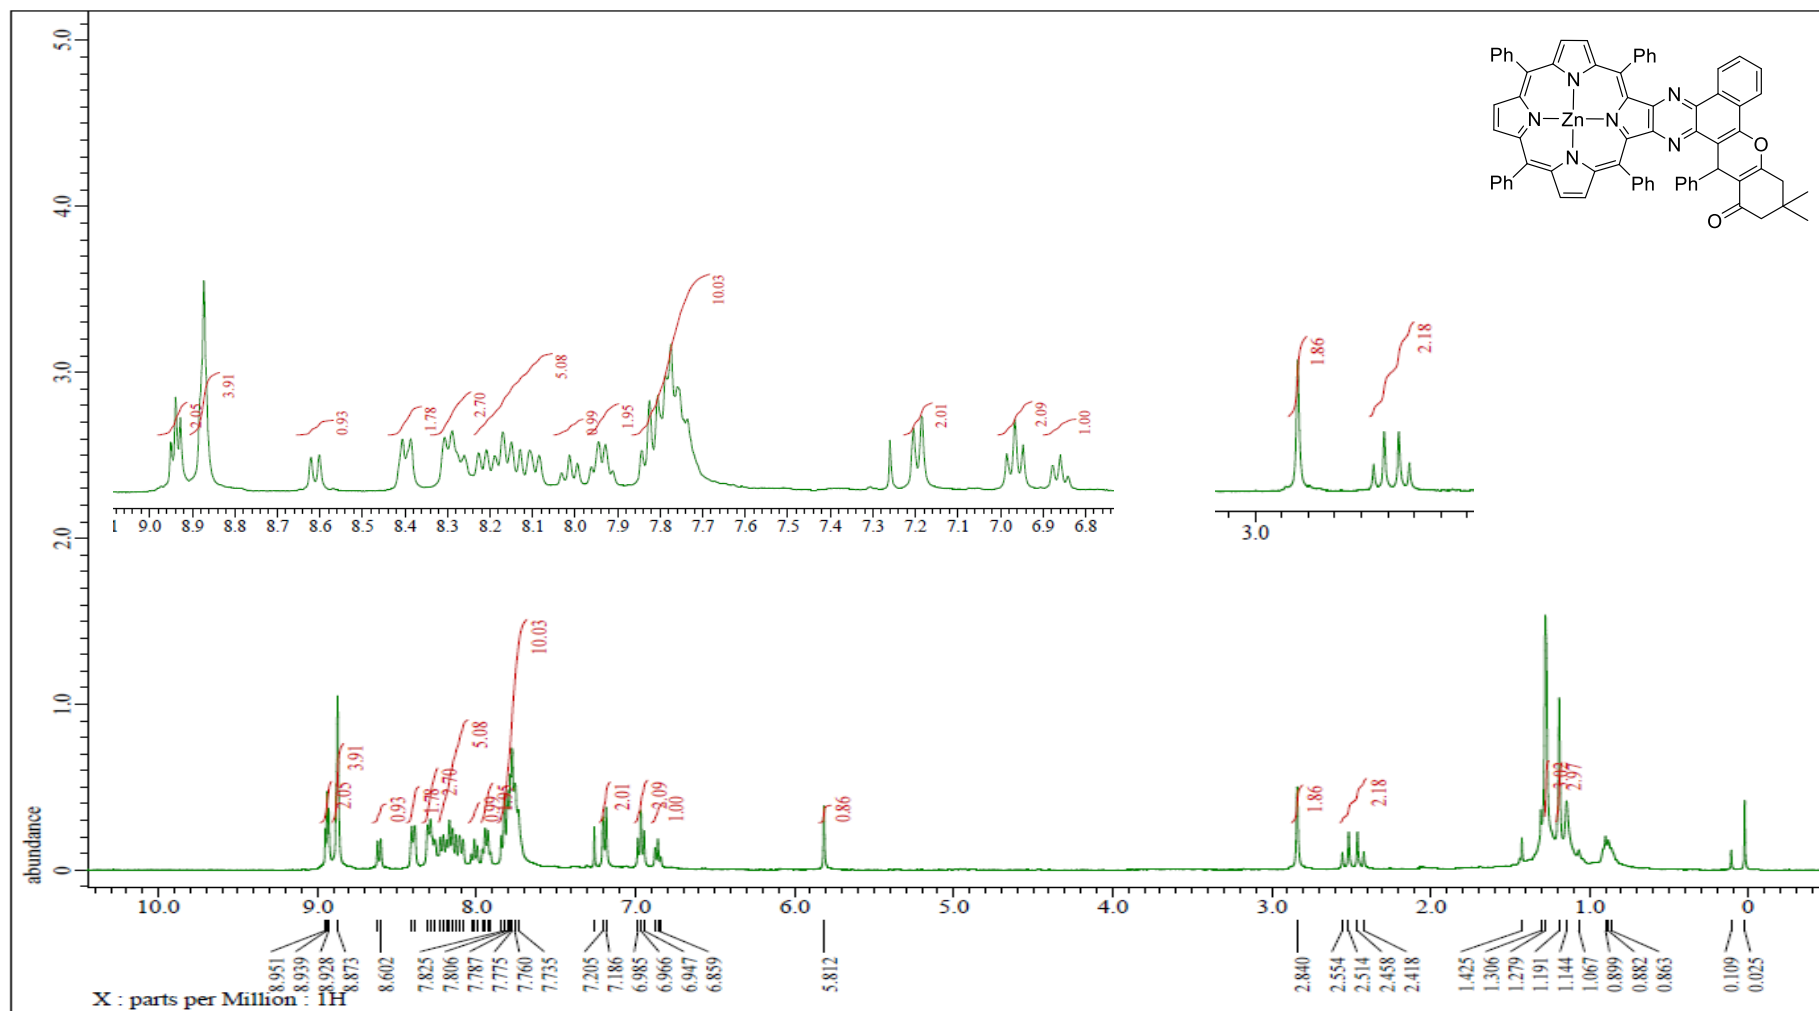

Figure 14.  $^1\text{H}$  NMR spectrum of porphyrin 16 in  $\text{CDCl}_3$ .

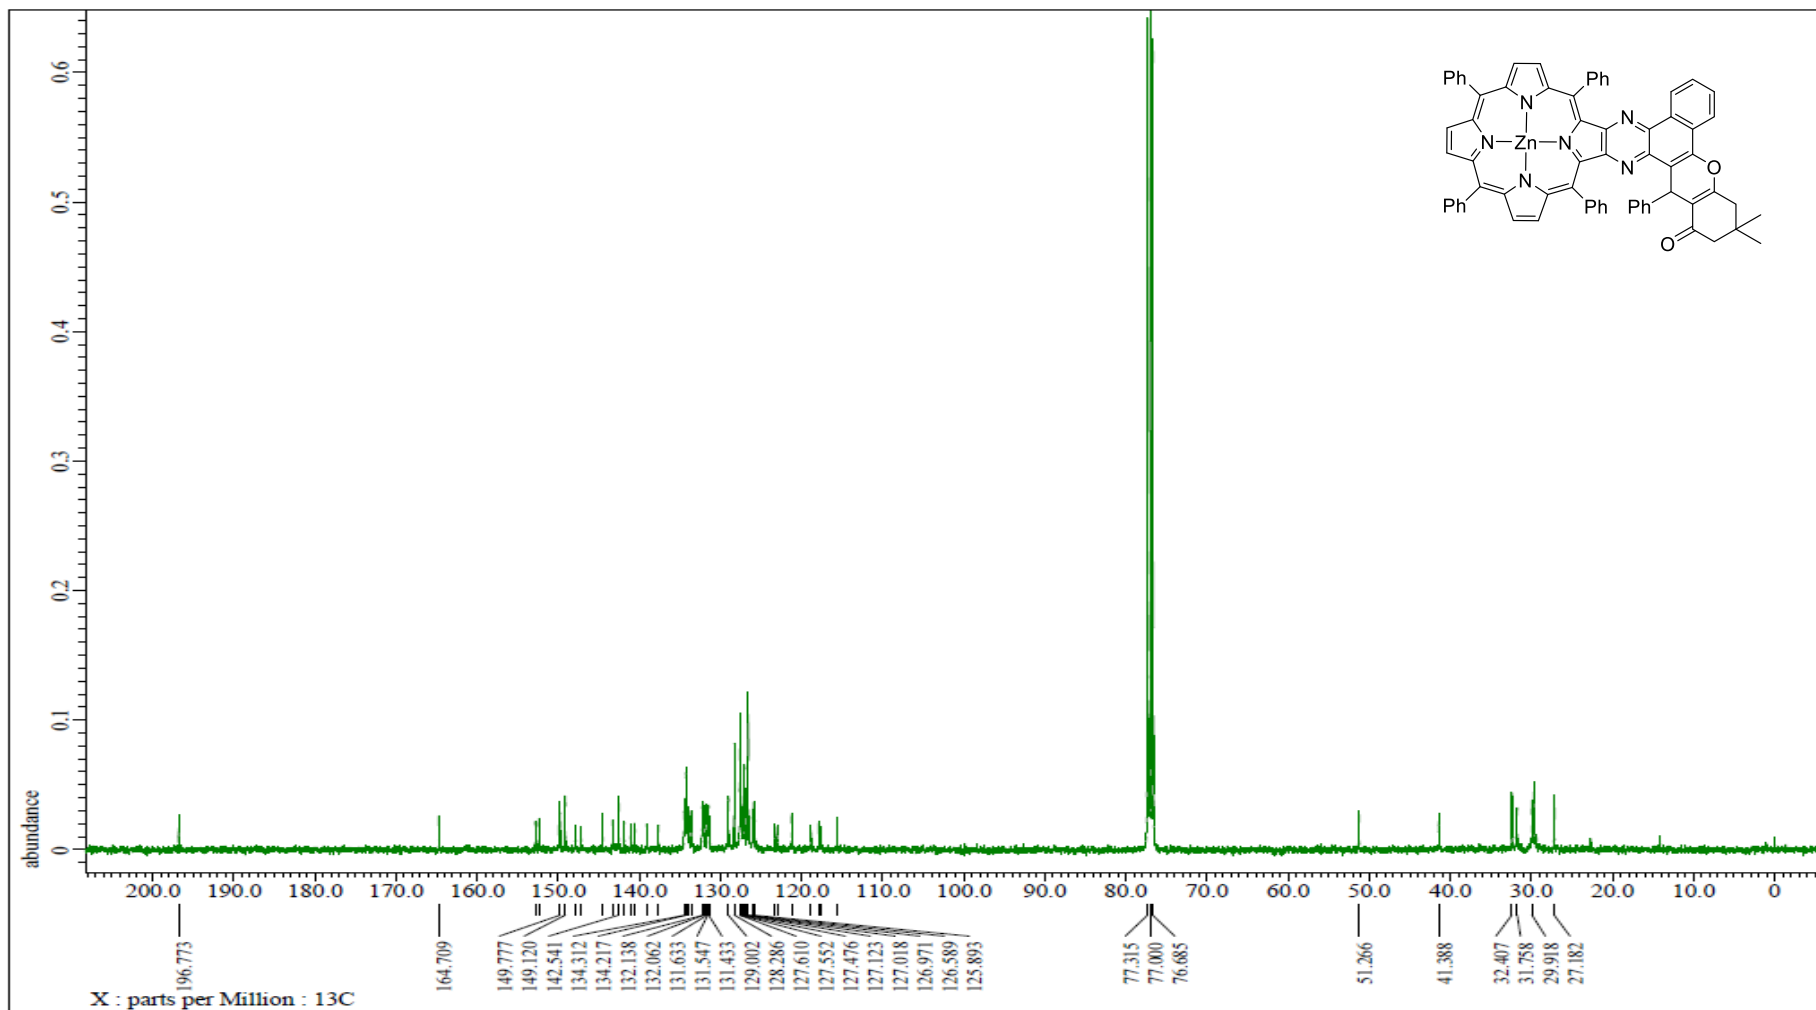

Supplement: Additional file 1 [file 1860-5397-19-89-S1.pdf]
